# Supplementary material for: Dynamic Metabolic Disruption in Rats Perinatally Exposed to Low Doses of Bisphenol-A
Source: PLoS One. 2015 Oct 30;10(10):e0141698. doi: 10.1371/journal.pone.0141698 (PMC4627775; doi:10.1371/journal.pone.0141698)
Supplement: S6 Table — (XLSX) [file pone.0141698.s008.xlsx]

## Sheet: Feuil1
Observation	Dose	Time	9.995	9.985	9.975	9.965	9.955	9.945	9.935	9.925	9.915	9.905	9.895	9.885	9.875	9.865	9.855	9.845	9.835	9.825	9.815	9.805	9.795	9.785	9.775	9.765	9.755	9.745	9.735	9.725	9.715	9.705	9.695	9.685	9.675	9.665	9.655	9.645	9.635	9.625	9.615	9.605	9.595	9.585	9.575	9.565	9.555	9.545	9.535
1086A	DMSO	PND21	7.37e-06	4.25e-06	5.6e-06	3.53e-06	3.83e-06	6.79e-06	4.09e-06	3.27e-06	5.67e-06	5.88e-06	3.57e-06	3.18e-06	4.41e-06	3.61e-06	5.5e-06	4.16e-06	3.79e-06	4.58e-06	2.94e-06	5.73e-06	4e-06	6.89e-06	3.59e-06	4.64e-06	5.2e-06	6.04e-06	5.07e-06	4.54e-06	3.57e-06	3.25e-06	3.49e-06	6.27e-06	4.68e-06	5.15e-06	3.81e-06	4.51e-06	4.36e-06	7.474e-05	3.744e-05	0.00012123	8.98e-06	4.36e-06	4.01e-06	4.4e-06	6.12e-06	4.86e-06	4.33e-06
1093A	DMSO	PND21	9.6e-06	7.76e-06	6.79e-06	5.17e-06	5.51e-06	8.53e-06	6.11e-06	1.113e-05	9.93e-06	2.75e-06	8.68e-06	1.186e-05	7e-06	7.31e-06	7.79e-06	5.57e-06	6.27e-06	6.34e-06	6.91e-06	7.29e-06	8.07e-06	8.05e-06	8.94e-06	5.43e-06	6.87e-06	5.14e-06	6.12e-06	6.16e-06	5.34e-06	6.47e-06	5.98e-06	3.08e-06	6.52e-06	6.38e-06	5.19e-06	4.12e-06	6.04e-06	1.839e-05	2.704e-05	8.104e-05	7.01e-06	4.3e-06	4.03e-06	7.73e-06	8.04e-06	8.55e-06	9.14e-06
1076A	DMSO	PND21	3.97e-06	6.32e-06	4.22e-06	3.86e-06	5.55e-06	4.33e-06	2.82e-06	4.7e-06	8.31e-06	7.72e-06	5.42e-06	8.93e-06	5.87e-06	3.17e-06	5.44e-06	5.33e-06	4.84e-06	4.86e-06	8.49e-06	7.94e-06	6.13e-06	6.5e-06	4.88e-06	5.05e-06	7.3e-06	5.62e-06	5.3e-06	3.22e-06	6.65e-06	3.68e-06	7.1e-06	5.47e-06	3.68e-06	4.38e-06	6.27e-06	5.39e-06	5.56e-06	3.463e-05	2.315e-05	8.833e-05	5.48e-06	5.94e-06	4.13e-06	3.55e-06	4.1e-06	1.014e-05	5.97e-06
1121A	DMSO	PND21	4.67e-06	5.07e-06	5.43e-06	3.76e-06	4.87e-06	6.37e-06	3.08e-06	5.02e-06	3.95e-06	4.64e-06	7.77e-06	6.34e-06	4.36e-06	6.23e-06	5.02e-06	6.25e-06	3.39e-06	5.68e-06	3.56e-06	4.46e-06	4.06e-06	5.28e-06	6.52e-06	3.73e-06	3.69e-06	4.9e-06	7.15e-06	2.55e-06	5.13e-06	4.56e-06	7.73e-06	3.69e-06	5.05e-06	5.92e-06	6.08e-06	5.76e-06	4.67e-06	3.322e-05	1.335e-05	5.018e-05	5.44e-06	6.09e-06	3.99e-06	6.51e-06	6.87e-06	7.9e-06	8.04e-06
293A	DMSO	PND21	7.3e-06	7.39e-06	6.17e-06	3.65e-06	4.83e-06	3.52e-06	4.77e-06	5.36e-06	3.92e-06	3.84e-06	3.22e-06	5.63e-06	3.25e-06	5.66e-06	4.82e-06	4.87e-06	4.34e-06	4.19e-06	3.85e-06	3.44e-06	7.41e-06	4.38e-06	5.93e-06	2.69e-06	5.31e-06	2.39e-06	3.25e-06	6.32e-06	8.8e-06	3.55e-06	3.72e-06	7.09e-06	3.95e-06	4.46e-06	3.76e-06	5.09e-06	3.81e-06	6.111e-05	1.976e-05	8.254e-05	9.48e-06	5.41e-06	4.67e-06	4.6e-06	5.32e-06	4.45e-06	4.07e-06
449A	DMSO	PND21	6.18e-06	7.18e-06	5.94e-06	5.39e-06	4.32e-06	5.97e-06	5.31e-06	4e-06	5.21e-06	5.16e-06	4.63e-06	4.46e-06	1.008e-05	6.41e-06	4.72e-06	7.11e-06	6.06e-06	5.22e-06	5.21e-06	1.03e-05	8.83e-06	4.6e-06	4.59e-06	8.03e-06	6.93e-06	7.38e-06	6.76e-06	4.45e-06	6.89e-06	5.33e-06	3.04e-06	3.13e-06	6.65e-06	6.99e-06	3.96e-06	3.88e-06	3.86e-06	1.16e-05	2.648e-05	9.749e-05	6.2e-06	7.11e-06	6.21e-06	5.88e-06	7.37e-06	6.09e-06	5.42e-06
459A	DMSO	PND21	5.07e-06	5.55e-06	5.55e-06	5.56e-06	2.9e-06	4.65e-06	3.12e-06	2.56e-06	7.44e-06	8.74e-06	6.99e-06	4.32e-06	5.19e-06	4.57e-06	4.11e-06	2.95e-06	5.51e-06	4.85e-06	5.01e-06	6.08e-06	3.36e-06	4.43e-06	4.17e-06	4.71e-06	3.62e-06	7.53e-06	3.68e-06	5.58e-06	6.53e-06	5.38e-06	4.23e-06	5.96e-06	3.3e-06	4.88e-06	5.25e-06	5.02e-06	5.34e-06	6.771e-05	2.014e-05	6.5e-05	4.28e-06	6.31e-06	6.78e-06	4.48e-06	5.83e-06	6.85e-06	5.09e-06
492A	DMSO	PND21	3.77e-06	4.41e-06	5.96e-06	6.01e-06	5.36e-06	3.67e-06	7.24e-06	4.23e-06	7.36e-06	4.63e-06	5.33e-06	3.91e-06	2.82e-06	4.22e-06	8.77e-06	2.68e-06	5.78e-06	4.91e-06	6.32e-06	8.74e-06	6.04e-06	4.7e-06	7.05e-06	4.11e-06	7.97e-06	4.84e-06	5.23e-06	6.4e-06	2.7e-06	2.85e-06	8.75e-06	3.99e-06	5.25e-06	3.39e-06	4.25e-06	6.4e-06	4.94e-06	4.133e-05	2.375e-05	8.3e-05	7.29e-06	5.81e-06	3.65e-06	7.04e-06	6.98e-06	7.2e-06	7.44e-06
224A	DMSO	PND21	5.6e-06	3.51e-06	4.31e-06	3.15e-06	4.65e-06	4.34e-06	4.62e-06	4.61e-06	4.76e-06	4.41e-06	5.2e-06	5.85e-06	8.92e-06	6.28e-06	5.51e-06	5.71e-06	4.5e-06	6.81e-06	2.87e-06	3.68e-06	5.16e-06	4.89e-06	6.29e-06	4.81e-06	5.19e-06	4.46e-06	4.2e-06	4.32e-06	5.15e-06	5.86e-06	5.5e-06	4.84e-06	1.67e-06	3.2e-06	5.66e-06	6.35e-06	2.65e-06	2.741e-05	1.01e-05	4.189e-05	4.73e-06	4.78e-06	4.94e-06	5.65e-06	5.26e-06	2.69e-06	6.97e-06
564A	DMSO	PND21	5.84e-06	5.03e-06	5.77e-06	6.41e-06	4.64e-06	3.9e-06	4.24e-06	4.48e-06	6.63e-06	4.55e-06	4.88e-06	4.84e-06	4.23e-06	6.2e-06	7.27e-06	4.96e-06	5.75e-06	5.13e-06	4.67e-06	9.17e-06	4.43e-06	5.82e-06	4.28e-06	7.45e-06	6.99e-06	6.59e-06	3.61e-06	4.57e-06	3.12e-06	4.1e-06	5.28e-06	7.15e-06	5.7e-06	3.58e-06	4.02e-06	4.31e-06	6.53e-06	5.019e-05	1.62e-05	4.182e-05	7.08e-06	4.79e-06	7.62e-06	4.53e-06	6e-06	8.27e-06	5.22e-06
459B	DMSO	PND50	5.98e-06	5.32e-06	5.02e-06	4.83e-06	6.15e-06	4.59e-06	4.88e-06	5.54e-06	5.26e-06	4.72e-06	6.19e-06	3.59e-06	4.65e-06	6e-06	5.46e-06	7.03e-06	5.62e-06	4.83e-06	7.43e-06	7.48e-06	2.96e-06	6.37e-06	4.59e-06	6.24e-06	6.16e-06	5.13e-06	4.73e-06	7.07e-06	5.25e-06	5.88e-06	5.19e-06	5.85e-06	5.99e-06	9.54e-06	6.76e-06	5.52e-06	6.53e-06	2.295e-05	1.594e-05	8.888e-05	8.74e-06	5.08e-06	4.87e-06	4.87e-06	4.4e-06	5.93e-06	6.5e-06
1076B	DMSO	PND50	7.87e-06	4.41e-06	3.69e-06	3.34e-06	4.4e-06	4.94e-06	4.65e-06	4.01e-06	5.3e-06	7.34e-06	5.55e-06	4.21e-06	4.88e-06	3.39e-06	4.57e-06	7.33e-06	5.29e-06	6.76e-06	5.89e-06	3.13e-06	2.79e-06	5.72e-06	4.33e-06	6.45e-06	5.07e-06	6.51e-06	5.29e-06	8.3e-06	2.69e-06	5.15e-06	4.3e-06	3.78e-06	3.26e-06	5.5e-06	5.14e-06	8.47e-06	5.83e-06	1.785e-05	1.127e-05	7.288e-05	7.26e-06	3.95e-06	3.91e-06	8.02e-06	4.24e-06	4.97e-06	6.61e-06
1121B	DMSO	PND50	5.31e-06	7.86e-06	8.15e-06	7.4e-06	4.1e-06	5.54e-06	5.56e-06	4.98e-06	4.22e-06	5.83e-06	6.77e-06	4.59e-06	6.46e-06	6.01e-06	7.94e-06	8.62e-06	7.81e-06	6.61e-06	5.68e-06	6.25e-06	1.012e-05	1.01e-05	5.12e-06	4.9e-06	3.15e-06	6.63e-06	7.26e-06	3.97e-06	6.67e-06	6.31e-06	8.88e-06	5.73e-06	7.44e-06	6.86e-06	5.65e-06	6.09e-06	6.75e-06	3.868e-05	1.968e-05	0.00010317	6.65e-06	7.69e-06	5.62e-06	9.72e-06	7.24e-06	5.97e-06	7.8e-06
277B	DMSO	PND50	4.46e-06	4.45e-06	6.46e-06	4.88e-06	9.42e-06	4.37e-06	6.42e-06	3.75e-06	4.39e-06	4.71e-06	5.09e-06	5.37e-06	5.42e-06	5.1e-06	6.61e-06	6.82e-06	3.58e-06	6.21e-06	3.41e-06	6.55e-06	3.48e-06	5.02e-06	5.46e-06	3.74e-06	6.17e-06	7.08e-06	6e-06	3.93e-06	6.56e-06	4.1e-06	6.95e-06	4.45e-06	6.54e-06	5.97e-06	5.44e-06	8.55e-06	4.5e-06	2.668e-05	1.53e-05	0.00011497	9.37e-06	5.24e-06	4.37e-06	5.59e-06	3.7e-06	7.07e-06	5.03e-06
293B	DMSO	PND50	5.59e-06	6.06e-06	5.12e-06	4.67e-06	3.63e-06	6.44e-06	6e-06	6.96e-06	6.85e-06	5.02e-06	5.76e-06	3.67e-06	4.93e-06	6e-06	6.41e-06	3.27e-06	5.21e-06	5.12e-06	4.33e-06	5.67e-06	4.41e-06	5.84e-06	6e-06	5.21e-06	5.07e-06	5.09e-06	7.69e-06	4.16e-06	4.67e-06	4.07e-06	6.45e-06	4.31e-06	7.17e-06	6.85e-06	4.79e-06	3.74e-06	4.78e-06	2.941e-05	9.84e-06	3.951e-05	2.349e-05	4.85e-06	3.62e-06	1.83e-06	5.56e-06	6.56e-06	7.55e-06
449B	DMSO	PND50	7.99e-06	6.94e-06	7.29e-06	7.36e-06	4.8e-06	6.05e-06	7.16e-06	5.47e-06	5.82e-06	4.05e-06	7.5e-06	8.11e-06	8.5e-06	8.54e-06	6.77e-06	7.83e-06	7.83e-06	8.51e-06	7.38e-06	6.22e-06	6.97e-06	6.1e-06	6.7e-06	5.65e-06	9.27e-06	1.049e-05	5.69e-06	5.93e-06	4.7e-06	4.17e-06	5.22e-06	8.31e-06	5.57e-06	8.87e-06	8.57e-06	8.89e-06	8.4e-06	4.135e-05	2.09e-05	7.667e-05	6.2e-06	7.97e-06	8.99e-06	1.129e-05	8.1e-06	8.45e-06	7.19e-06
488B	DMSO	PND50	4.64e-06	6.92e-06	3.37e-06	4.37e-06	4.61e-06	8.33e-06	6.62e-06	5.89e-06	6.61e-06	4.28e-06	8.97e-06	7.08e-06	6.16e-06	4.18e-06	1.96e-06	5.51e-06	6.61e-06	4.21e-06	6.04e-06	7.32e-06	6.67e-06	7.63e-06	5.63e-06	6.39e-06	4.29e-06	4.95e-06	4.99e-06	3.8e-06	6.91e-06	6.28e-06	6.81e-06	4.5e-06	4.42e-06	5.34e-06	2.92e-06	3.65e-06	8.49e-06	1.121e-05	7.98e-06	7.284e-05	1.158e-05	3.45e-06	4.69e-06	6.03e-06	5.3e-06	7.21e-06	5.93e-06
492B	DMSO	PND50	5.23e-06	4.54e-06	5.95e-06	4.02e-06	4.25e-06	6.39e-06	5.38e-06	7.13e-06	6.28e-06	3.92e-06	6.36e-06	2.59e-06	5.72e-06	5.33e-06	6.58e-06	6.02e-06	5.66e-06	5.36e-06	6.83e-06	6.12e-06	5e-06	4.35e-06	6.45e-06	4.27e-06	4.2e-06	3.62e-06	4.15e-06	5.97e-06	5.2e-06	3.51e-06	7.17e-06	5.12e-06	3.87e-06	7.28e-06	4.24e-06	6.21e-06	7.03e-06	2.296e-05	5.63e-06	7.045e-05	1.516e-05	3.42e-06	6.49e-06	6.17e-06	5.01e-06	6.67e-06	6.3e-06
600B	DMSO	PND50	7.9e-06	1.145e-05	7.32e-06	3.49e-06	7.98e-06	3.7e-06	8.35e-06	5.45e-06	9.01e-06	5.9e-06	5.9e-06	4.25e-06	5.45e-06	5.98e-06	5.54e-06	6.1e-06	8.72e-06	7.19e-06	4.15e-06	8.07e-06	9.11e-06	5.11e-06	1.077e-05	7.02e-06	2.47e-06	6.57e-06	6.13e-06	4.22e-06	7.16e-06	7.35e-06	8.09e-06	5.99e-06	9.67e-06	4.85e-06	6.86e-06	7.91e-06	7.8e-06	9.79e-06	1.148e-05	8.157e-05	8.49e-06	6.43e-06	5.74e-06	8.33e-06	5.93e-06	8.27e-06	5.91e-06
564B	DMSO	PND50	3.55e-06	7.51e-06	5.57e-06	4.75e-06	5.65e-06	4.52e-06	4.12e-06	5.35e-06	3.56e-06	4.24e-06	6.94e-06	6.79e-06	3.64e-06	8.37e-06	5.43e-06	3.51e-06	6.9e-06	4.98e-06	7.88e-06	5.87e-06	4.38e-06	3.3e-06	5.4e-06	4.8e-06	2.97e-06	6.82e-06	9.67e-06	4.89e-06	6.03e-06	5.31e-06	4.1e-06	5.68e-06	6.36e-06	4.57e-06	4.51e-06	7.66e-06	6.18e-06	5.02e-05	1.905e-05	8.122e-05	7.82e-06	5.79e-06	8.06e-06	3.01e-06	7.08e-06	6.39e-06	4.69e-06
926	DMSO	PND90	4.22475e-06	5.91228e-06	6.73893e-06	5.48074e-06	5.16203e-06	7.59865e-06	5.99063e-06	4.49981e-06	7.27608e-06	3.84893e-06	6.72205e-06	4.62665e-06	4.98822e-06	5.36094e-06	8.12376e-06	4.80737e-06	4.69e-06	6.8392e-06	3.05334e-06	5.34549e-06	6.14049e-06	4.85269e-06	8.12474e-06	4.72049e-06	8.28282e-06	5.79529e-06	4.53438e-06	3.80658e-06	8.24918e-06	7.21254e-06	7.63961e-06	4.93719e-06	7.01739e-06	6.87775e-06	4.43859e-06	4.62277e-06	4.11725e-06	2.44068e-05	2.16853e-05	4.96837e-05	9.49874e-06	5.94254e-06	7.64214e-06	6.56113e-06	6.45698e-06	1.56714e-06	3.30572e-06
962	DMSO	PND90	5.31139e-06	7.3732e-06	6.63488e-06	4.81287e-06	6.82057e-06	2.57888e-06	6.12741e-06	4.42194e-06	7.03006e-06	4.60908e-06	3.88074e-06	4.06445e-06	6.68471e-06	5.63009e-06	4.92875e-06	8.63175e-06	2.43497e-06	8.22704e-06	3.23809e-06	5.6179e-06	7.92411e-06	5.31242e-06	4.10364e-06	4.43372e-06	8.41289e-06	4.66883e-06	6.55845e-06	4.05494e-06	5.2071e-06	3.98757e-06	6.10833e-06	3.96987e-06	6.49398e-06	6.61366e-06	5.8914e-06	6.93983e-06	7.05384e-06	5.53927e-05	1.50342e-05	9.06107e-05	6.43445e-06	6.40332e-06	4.81735e-06	6.18525e-06	5.30903e-06	4.28797e-06	7.44633e-06
633	DMSO	PND90	4.43e-06	5.52e-06	6.49e-06	4.95e-06	5.18e-06	3.75e-06	7.6e-06	7.52e-06	5.6e-06	5.05e-06	4.45e-06	7.12e-06	4.59e-06	7.5e-06	7.49e-06	6.46e-06	5.29e-06	7.95e-06	6.88e-06	7.69e-06	5.17e-06	4.66e-06	5.39e-06	7.83e-06	5.41e-06	3.9e-06	4.65e-06	5.42e-06	3.07e-06	5.09e-06	5.5e-06	3.62e-06	3.89e-06	6.05e-06	2.23e-06	4.95e-06	5.48e-06	3.083e-05	1.445e-05	0.00010167	2.798e-05	3.77e-06	3.05e-06	6.17e-06	5.75e-06	5.13e-06	7.48e-06
768	DMSO	PND90	4.08e-06	5.5e-06	6.43e-06	7.2e-06	9.11e-06	8e-06	5.21e-06	4.8e-06	9.32e-06	7.88e-06	7.47e-06	3.5e-06	9e-06	7.46e-06	7.11e-06	3.81e-06	5.59e-06	5.67e-06	4.42e-06	1.082e-05	5.25e-06	4.76e-06	5.33e-06	6.99e-06	6.77e-06	9.3e-06	6.11e-06	6.18e-06	4e-06	5.54e-06	7.48e-06	1.384e-05	5.6e-06	5.79e-06	7.58e-06	9.21e-06	5.63e-06	2.576e-05	1.08e-05	0.00010331	2.363e-05	6.58e-06	6.19e-06	3.09e-06	8.06e-06	9.43e-06	5.74e-06
875	DMSO	PND90	5.72e-06	4.5e-06	8.65e-06	1.005e-05	5.47e-06	4.48e-06	6.88e-06	6.96e-06	4.25e-06	1.081e-05	8.74e-06	8.35e-06	1.179e-05	1.079e-05	7.45e-06	6.63e-06	9.98e-06	7.44e-06	5.17e-06	5.61e-06	5.91e-06	8.86e-06	1.068e-05	5.22e-06	7.38e-06	9.41e-06	6.63e-06	1.343e-05	6.92e-06	1.012e-05	1.047e-05	5.42e-06	6.07e-06	5.84e-06	7.85e-06	1.313e-05	5.62e-06	1.295e-05	1.084e-05	9.637e-05	1.134e-05	8.46e-06	1.269e-05	8.56e-06	9.93e-06	6.23e-06	9.26e-06
934	DMSO	PND90	7.64e-06	4.64e-06	6.22e-06	4.16e-06	6.72e-06	4.75e-06	4.8e-06	5.46e-06	5.91e-06	8.08e-06	5.26e-06	3.35e-06	5.86e-06	4.72e-06	4.06e-06	7.65e-06	6.08e-06	3.97e-06	8.32e-06	4.83e-06	7.64e-06	3.66e-06	5e-06	5.56e-06	6.28e-06	7.37e-06	3.61e-06	3.44e-06	4.31e-06	1.077e-05	7.44e-06	5.99e-06	5.5e-06	9.19e-06	5.95e-06	6.09e-06	4.62e-06	2.86e-05	1.169e-05	6.263e-05	2.158e-05	5.04e-06	9.98e-06	9.31e-06	5.5e-06	6.64e-06	6e-06
946	DMSO	PND90	1.087e-05	4.57e-06	3.27e-06	5.22e-06	5.8e-06	5.83e-06	5.82e-06	4.35e-06	7.44e-06	5.05e-06	4.45e-06	8.73e-06	5.93e-06	6.1e-06	7.35e-06	7.08e-06	5.11e-06	6.52e-06	4.99e-06	6.07e-06	6.05e-06	4.17e-06	5.68e-06	6.51e-06	5.34e-06	5.74e-06	4.83e-06	6.53e-06	5.77e-06	5.39e-06	3.38e-06	4.61e-06	8.08e-06	7.64e-06	9.89e-06	6.11e-06	5.16e-06	2.28e-05	8.77e-06	9.175e-05	1.743e-05	5.42e-06	6.89e-06	6.13e-06	4.47e-06	6.82e-06	7.5e-06
1043	DMSO	PND90	6.87e-06	7.23e-06	3.97e-06	2.77e-06	5.45e-06	4.53e-06	5.45e-06	3.21e-06	6.47e-06	4.96e-06	6.26e-06	5.88e-06	4.82e-06	7.56e-06	4.91e-06	4.41e-06	6.22e-06	6.19e-06	5.81e-06	8e-06	7.42e-06	6.62e-06	4.88e-06	4.36e-06	7.34e-06	7.15e-06	3.86e-06	5.78e-06	5.38e-06	7.96e-06	3.18e-06	4.08e-06	4.71e-06	6.34e-06	7.35e-06	5.54e-06	6.26e-06	1.79e-05	8.45e-06	7.453e-05	2.412e-05	6.89e-06	4.18e-06	3.76e-06	4.87e-06	7.29e-06	5.66e-06
725	DMSO	PND90	2.48e-06	6.05e-06	2.81e-06	4.88e-06	7.07e-06	6.04e-06	4.78e-06	4.69e-06	3.21e-06	5.5e-06	5.91e-06	4.55e-06	5.83e-06	5.04e-06	9.37e-06	6.72e-06	3.59e-06	6.34e-06	5.76e-06	3.24e-06	4.44e-06	6.55e-06	5.37e-06	7.12e-06	5.86e-06	3.45e-06	3.41e-06	5.24e-06	7.24e-06	3.91e-06	4.4e-06	3.99e-06	6.33e-06	5.55e-06	4.62e-06	7.08e-06	5.16e-06	2.43e-05	1.071e-05	8.92e-05	1.293e-05	6.9e-06	3.11e-06	4.41e-06	4.72e-06	5.44e-06	4.6e-06
665	DMSO	PND90	2.59e-06	4.77e-06	3.67e-06	8.71e-06	5.85e-06	3.21e-06	3.97e-06	6.2e-06	5.6e-06	3.57e-06	6.31e-06	6.09e-06	5.86e-06	5.75e-06	6.43e-06	5.85e-06	5.06e-06	5.49e-06	4.13e-06	5.27e-06	7.08e-06	4.99e-06	3.32e-06	6.04e-06	6.08e-06	3.1e-06	6.29e-06	3.59e-06	7.27e-06	5.83e-06	5.4e-06	5.96e-06	4.9e-06	4.26e-06	5.73e-06	3.97e-06	6.29e-06	3.8e-05	9.85e-06	6.981e-05	1.687e-05	5.58e-06	7.39e-06	5.49e-06	7.11e-06	6.81e-06	5.83e-06
927	DMSO	PND140	3.4e-06	3.14e-06	3.42e-06	4.39e-06	5.3e-06	5.18e-06	3.9e-06	6e-06	9.26e-06	3.01e-06	2.89e-06	3.71e-06	5.59e-06	5.37e-06	8.27e-06	7.58e-06	7.09e-06	8.81e-06	9.05e-06	6.83e-06	4.04e-06	4.78e-06	6.57e-06	5.54e-06	8.75e-06	6.06e-06	3.87e-06	5.82e-06	4.47e-06	7.1e-06	4.98e-06	6.3e-06	5.31e-06	6.17e-06	6.28e-06	5.46e-06	5.87e-06	7.001e-05	2.82e-05	9.413e-05	5.88e-06	2.4e-06	4.24e-06	5.66e-06	6.78e-06	5.41e-06	7.48e-06
961	DMSO	PND140	4.86e-06	6.52e-06	1.236e-05	7.59e-06	1.281e-05	7.3e-06	7.64e-06	5.44e-06	6.18e-06	7.25e-06	6.05e-06	6.84e-06	6.36e-06	3e-06	9.4e-06	7.75e-06	8.02e-06	5.64e-06	9.43e-06	5.7e-06	7.9e-06	6.92e-06	3.99e-06	7.4e-06	4.79e-06	7.39e-06	7.83e-06	8.15e-06	8.48e-06	8.86e-06	4.96e-06	8.21e-06	6.71e-06	5.81e-06	6.55e-06	6.26e-06	5.47e-06	2.578e-05	1.302e-05	8.499e-05	9.4e-06	6.87e-06	7.15e-06	5.41e-06	1.149e-05	6.67e-06	6.66e-06
632	DMSO	PND140	4.0151e-06	6.56628e-06	5.16405e-06	2.45173e-06	4.77979e-06	4.8265e-06	6.24415e-06	4.33177e-06	3.94583e-06	4.61462e-06	9.54419e-06	9.49749e-06	6.21315e-07	6.03348e-06	4.41163e-06	7.186e-06	4.28374e-06	7.93662e-06	6.33047e-06	3.84293e-06	8.5425e-06	6.382e-06	7.74616e-06	8.06502e-06	5.67944e-06	4.41082e-06	8.41842e-06	5.96784e-06	6.79177e-06	5.8885e-06	6.96923e-06	4.47191e-06	5.2331e-06	4.75441e-06	5.41018e-06	1.09396e-05	5.41187e-06	4.49816e-05	1.34098e-05	4.9865e-05	5.66454e-06	5.13447e-06	6.68585e-06	4.88341e-06	6.38012e-06	5.04914e-06	4.116e-06
874	DMSO	PND140	1.8414e-06	3.99859e-06	5.48569e-06	4.85877e-06	5.29463e-06	3.91268e-06	4.30791e-06	1.96197e-06	5.86951e-06	5.31801e-06	5.88308e-06	8.30789e-06	8.81603e-06	6.16393e-06	7.6816e-06	4.67814e-06	8.29163e-06	7.1381e-06	6.94362e-06	6.63146e-06	9.50076e-06	5.02672e-06	6.77285e-06	4.91274e-06	7.27943e-06	3.66185e-06	4.97172e-06	6.26555e-06	2.61868e-06	4.96432e-06	2.5703e-06	7.07511e-06	3.97553e-06	3.80531e-06	6.50782e-06	4.40054e-06	5.88845e-06	6.11465e-05	2.66968e-05	6.06411e-05	6.50345e-06	7.05282e-06	5.48149e-06	4.42098e-06	4.6875e-06	5.0721e-06	7.46699e-06
935	DMSO	PND140	5.61092e-06	5.01523e-06	5.97126e-06	4.2665e-06	4.43299e-06	5.45444e-06	3.24626e-06	6.7962e-06	4.5169e-06	6.54425e-06	3.99001e-06	2.09733e-06	6.63331e-06	7.47002e-06	4.61792e-06	2.89239e-06	7.53659e-06	3.80978e-06	2.6845e-06	8.20789e-06	8.43557e-06	4.9392e-06	5.101e-06	6.01627e-06	5.6035e-06	3.77565e-06	3.36635e-06	4.97432e-06	1.70088e-06	4.46542e-06	7.63181e-06	5.95934e-06	5.936e-06	5.86107e-06	8.27433e-06	7.24879e-06	3.07072e-06	1.65085e-05	4.53365e-06	6.25635e-05	3.98815e-06	7.25142e-06	4.60798e-06	4.38872e-06	5.70381e-06	5.68207e-06	6.24483e-06
944	DMSO	PND140	7.07264e-06	6.17818e-06	5.9107e-06	4.1468e-06	5.2752e-06	4.18324e-06	4.77728e-06	7.94716e-06	7.69207e-06	7.18459e-06	2.45878e-06	3.30696e-06	3.49955e-06	3.88107e-06	7.15893e-06	3.92872e-06	4.23058e-06	8.48238e-06	7.57708e-06	3.034e-06	5.53212e-06	4.04987e-06	6.13088e-06	6.71043e-06	8.65606e-06	4.20223e-06	9.1497e-07	5.97163e-06	7.02879e-06	3.61182e-06	4.9555e-06	5.99453e-06	3.6326e-06	2.98893e-06	6.39548e-06	6.00211e-06	4.44781e-06	3.39072e-05	1.9749e-05	6.61687e-05	8.02157e-06	7.84373e-06	6.54037e-06	4.23659e-06	4.97824e-06	4.82288e-06	8.45941e-06
1042	DMSO	PND140	7.53e-06	6.86e-06	6.02e-06	4.89e-06	6.91e-06	5.37e-06	8.29e-06	6.04e-06	5.82e-06	5.07e-06	4.49e-06	5.15e-06	5.48e-06	5.14e-06	3.28e-06	4.78e-06	8.68e-06	4.63e-06	4.6e-06	6.21e-06	7.32e-06	5.9e-06	6.16e-06	6.34e-06	4.67e-06	7.48e-06	7.03e-06	5.11e-06	5.99e-06	5.83e-06	4.1e-06	4.55e-06	8.36e-06	1.178e-05	7.56e-06	4.8e-06	4.77e-06	1.269e-05	8.99e-06	7.593e-05	2.199e-05	5.12e-06	5.51e-06	6.91e-06	6.91e-06	5.89e-06	2.94e-06
724f	DMSO	PND140	4.86e-06	6.68e-06	7.22e-06	3.83e-06	2.77e-06	4.6e-06	5.73e-06	6.93e-06	6.35e-06	3.68e-06	6.85e-06	4.74e-06	5.47e-06	7.35e-06	6.89e-06	3.96e-06	3.62e-06	3.09e-06	5.2e-06	8.21e-06	4.36e-06	2.55e-06	4.8e-06	5.58e-06	4.77e-06	4.5e-06	4.32e-06	3.86e-06	4.48e-06	3.31e-06	4.58e-06	4.3e-06	3.29e-06	5.04e-06	3.02e-06	2.82e-06	4.32e-06	2.021e-05	9.21e-06	9.022e-05	1.326e-05	3.72e-06	2.91e-06	4.36e-06	3.61e-06	4.78e-06	4.35e-06
769f	DMSO	PND140	6.39e-06	5.91e-06	7.73e-06	4.37e-06	7.78e-06	6.33e-06	4.14e-06	4.76e-06	5.41e-06	4.93e-06	5.35e-06	6.57e-06	6.01e-06	4.18e-06	7.9e-06	3.87e-06	3.85e-06	4.53e-06	5.62e-06	3.06e-06	5.22e-06	4.89e-06	2.87e-06	4.92e-06	6.68e-06	4.71e-06	5.98e-06	5.66e-06	6.75e-06	6.49e-06	5.79e-06	7.52e-06	8.53e-06	9.65e-06	5.58e-06	5.51e-06	3.27e-06	8.22e-06	8e-06	7.35e-05	2.142e-05	5.27e-06	6.43e-06	6.89e-06	7.01e-06	5.71e-06	5.36e-06
664	DMSO	PND140	4.66e-06	2.12e-06	3.11e-06	5.25e-06	6.32e-06	3.2e-06	5.07e-06	4.43e-06	5.54e-06	8.07e-06	8.12e-06	6.39e-06	3.51e-06	8.96e-06	6.88e-06	3.88e-06	5.14e-06	5.92e-06	4.81e-06	3.63e-06	4.59e-06	5.47e-06	1.032e-05	6.71e-06	9.53e-06	4.74e-06	6.39e-06	4.34e-06	4.42e-06	4.86e-06	6.45e-06	3.65e-06	2.6e-06	3.15e-06	3.34e-06	4.36e-06	6.8e-06	1.066e-05	6.94e-06	5.992e-05	4.112e-05	3.22e-06	5.54e-06	5.7e-06	6.68e-06	6.41e-06	5.88e-06
631	DMSO	PND200	8.25e-06	4.02e-06	4.45e-06	6.74e-06	9.17e-06	8.1e-06	8.99e-06	6.8e-06	4.91e-06	5.59e-06	6.16e-06	5.48e-06	5.74e-06	4.87e-06	5.52e-06	3.73e-06	8.58e-06	5.5e-06	7.58e-06	7.65e-06	6.05e-06	6.69e-06	6.52e-06	6.06e-06	6.56e-06	5.49e-06	4.64e-06	5.35e-06	7.01e-06	5.38e-06	7.68e-06	4.12e-06	5.09e-06	4.84e-06	5.58e-06	5.48e-06	5.58e-06	2.722e-05	1.419e-05	8.072e-05	1.172e-05	8.96e-06	7.73e-06	5.76e-06	7.5e-06	5.56e-06	6.44e-06
767	DMSO	PND200	6.82e-06	5.29e-06	5.41e-06	5.22e-06	3.74e-06	4.36e-06	3.78e-06	4.7e-06	3.9e-06	5.95e-06	5.1e-06	6.87e-06	4.09e-06	3.43e-06	7.33e-06	4.28e-06	5.82e-06	3.67e-06	6.51e-06	7.22e-06	5.22e-06	5.21e-06	3.71e-06	2.61e-06	5.18e-06	3.04e-06	5.34e-06	3.17e-06	5.62e-06	3.45e-06	4.02e-06	3.8e-06	6.09e-06	3.61e-06	6.41e-06	6.29e-06	2.58e-06	1.681e-05	4.88e-06	7.159e-05	2.311e-05	4.16e-06	4.4e-06	7.34e-06	4.19e-06	4.33e-06	3.82e-06
843	DMSO	PND200	4.6e-06	7.55e-06	4.19e-06	4.46e-06	5.83e-06	3.77e-06	4.71e-06	3.89e-06	5.4e-06	9.53e-06	6.73e-06	4.32e-06	9.27e-06	4.41e-06	8.02e-06	6.17e-06	4.41e-06	5.78e-06	5.82e-06	4.87e-06	6.89e-06	6.92e-06	9.61e-06	3.25e-06	5.7e-06	6.43e-06	6.59e-06	2.9e-06	3.56e-06	3.48e-06	6.5e-06	7.17e-06	5.09e-06	6.17e-06	4.61e-06	7.7e-06	5.4e-06	1.323e-05	9.42e-06	8.819e-05	1.186e-05	4e-06	6.02e-06	6.6e-06	5.91e-06	9.02e-06	9.04e-06
960	DMSO	PND200	5.14e-06	6.74e-06	3.84e-06	4.45e-06	5.72e-06	6.7e-06	3.6e-06	4.44e-06	4.34e-06	5.79e-06	5.28e-06	5.2e-06	8.66e-06	7.12e-06	7.58e-06	4.61e-06	5.47e-06	6.32e-06	5.37e-06	5.46e-06	5.65e-06	6.5e-06	8.34e-06	6.48e-06	4.79e-06	6.23e-06	7.9e-06	5.54e-06	1.084e-05	6.35e-06	7.63e-06	5.6e-06	4.79e-06	7.21e-06	5.1e-06	3.71e-06	4.86e-06	2.132e-05	8.74e-06	0.0001123	2.357e-05	4.54e-06	6.82e-06	6.91e-06	4.69e-06	4.68e-06	3.72e-06
663	DMSO	PND200	3.71e-06	5.52e-06	5.53e-06	4.46e-06	6.14e-06	4.19e-06	4.23e-06	7.75e-06	6.1e-06	5.29e-06	3.75e-06	5.72e-06	4.91e-06	4.34e-06	6.93e-06	5.8e-06	6.17e-06	6.31e-06	4.5e-06	4.67e-06	5.68e-06	5.19e-06	6.61e-06	4.27e-06	5.98e-06	4.07e-06	5.16e-06	7.01e-06	5.24e-06	7.27e-06	8.73e-06	5.3e-06	5.92e-06	8.25e-06	4.98e-06	6.08e-06	6.83e-06	1.906e-05	1.347e-05	9.229e-05	1.99e-05	1.92e-06	5.62e-06	6.76e-06	4.84e-06	6.55e-06	8.08e-06
928	DMSO	PND200	5.97e-06	4.64e-06	4.38e-06	4.13e-06	3.58e-06	3.36e-06	4.71e-06	4.52e-06	3.88e-06	4.37e-06	4.25e-06	3.7e-06	3.91e-06	3.84e-06	8.13e-06	7.29e-06	6.09e-06	4.87e-06	4.26e-06	5.43e-06	5.65e-06	6.45e-06	3.28e-06	4.08e-06	5.19e-06	6.91e-06	2.69e-06	3.86e-06	4.01e-06	5.21e-06	3.23e-06	5.13e-06	5.69e-06	6.1e-06	3.99e-06	2.71e-06	3.64e-06	5.23e-06	6.92e-06	3.976e-05	4.022e-05	2.47e-06	3.79e-06	5.94e-06	4.48e-06	3.38e-06	5e-06
1041	DMSO	PND200	4.7e-06	6.83e-06	4.48e-06	6.54e-06	6.91e-06	5.36e-06	6.49e-06	4.98e-06	7.02e-06	5.45e-06	7.22e-06	5.09e-06	6.37e-06	3.56e-06	7.29e-06	5.1e-06	6.97e-06	5.07e-06	7.11e-06	3.69e-06	3.89e-06	4.99e-06	5.31e-06	6.21e-06	8.02e-06	6.47e-06	6.82e-06	5.66e-06	3.94e-06	6.61e-06	6.65e-06	5.07e-06	5.5e-06	4.11e-06	4.61e-06	7.99e-06	7.03e-06	2.315e-05	1.14e-05	0.00012133	1.974e-05	4.88e-06	5.06e-06	7.82e-06	7.51e-06	8.6e-06	4.89e-06
723	DMSO	PND200	6.15e-06	7.54e-06	5.28e-06	2.81e-06	5.65e-06	5.7e-06	3.79e-06	7.32e-06	3.71e-06	6.02e-06	6.19e-06	6.74e-06	5.1e-06	7e-06	7.6e-06	4.64e-06	3.07e-06	7.48e-06	4.49e-06	4.84e-06	2.16e-06	5e-06	6.36e-06	6.94e-06	7.34e-06	5.98e-06	5.68e-06	6.63e-06	8.38e-06	6.47e-06	6.15e-06	3.78e-06	8.07e-06	6.28e-06	7.29e-06	6.03e-06	4.32e-06	3.57e-05	1.362e-05	7.271e-05	1.916e-05	6.27e-06	5.23e-06	4.81e-06	5.35e-06	6.55e-06	5.76e-06
936	DMSO	PND200	7.21e-06	4.48e-06	2.08e-06	7.35e-06	4.6e-06	3.94e-06	2.22e-06	4.59e-06	3.97e-06	3.26e-06	3.47e-06	5.52e-06	6.59e-06	2.94e-06	5.99e-06	5.15e-06	3.06e-06	7.37e-06	4.87e-06	5.46e-06	3.62e-06	7.83e-06	5.85e-06	5.65e-06	5.62e-06	3.37e-06	6.74e-06	6.07e-06	2.27e-06	4.72e-06	4.96e-06	4.5e-06	4.73e-06	4.33e-06	5.48e-06	4.9e-06	3.8e-06	3.467e-05	1.167e-05	7.824e-05	3.056e-05	7.35e-06	8.82e-06	4.05e-06	4.35e-06	7.83e-06	4.3e-06
948	DMSO	PND200	5.61e-06	5.58e-06	6.61e-06	6.1e-06	3.91e-06	5.7e-06	6.8e-06	8.53e-06	3.5e-06	4.77e-06	5.24e-06	8.47e-06	7.39e-06	8.48e-06	5.06e-06	6.36e-06	5.45e-06	1.088e-05	5.04e-06	3.58e-06	6.6e-06	7.27e-06	6.25e-06	5.87e-06	9.21e-06	7.21e-06	1.03e-05	7.61e-06	9.62e-06	9.19e-06	6.23e-06	6.66e-06	7.08e-06	8.09e-06	8.67e-06	4.43e-06	5.7e-06	6.4e-06	9.43e-06	6.82e-05	9.61e-06	8.54e-06	7.97e-06	7.17e-06	4.63e-06	5.87e-06	9.09e-06
1107A	0.25	PND21	3.78e-06	6.39e-06	8.05e-06	6.12e-06	4.67e-06	8.44e-06	7.07e-06	6.21e-06	4.54e-06	1.071e-05	6.84e-06	3.59e-06	1.08e-05	5.09e-06	7.65e-06	5.09e-06	5.65e-06	5.68e-06	8.9e-06	7.53e-06	6.68e-06	6.3e-06	7.01e-06	6.62e-06	5.99e-06	9.05e-06	5.91e-06	6.37e-06	3.75e-06	5.66e-06	6.82e-06	4.27e-06	3.43e-06	7.33e-06	4.57e-06	6.94e-06	6.84e-06	3.41e-06	6.43e-06	6.19e-05	1.417e-05	6.54e-06	5.33e-06	6.9e-06	5.47e-06	9.88e-06	8.08e-06
1067A	0.25	PND21	7.39e-06	7.06e-06	3.27e-06	2.41e-06	4.47e-06	6.28e-06	6.71e-06	4.53e-06	3.43e-06	8.01e-06	4.94e-06	7.6e-06	8.41e-06	5.07e-06	4.13e-06	8.2e-06	1.195e-05	4.4e-06	4.79e-06	6.29e-06	5.25e-06	6.1e-06	7.26e-06	6.09e-06	7.46e-06	7.27e-06	9.19e-06	7.24e-06	5.79e-06	6.6e-06	5.21e-06	5.1e-06	5.26e-06	7.89e-06	6.22e-06	5.82e-06	5.13e-06	4.314e-05	1.078e-05	8.967e-05	2.387e-05	9.56e-06	5.07e-06	4.18e-06	4.76e-06	6.37e-06	5.25e-06
273A	0.25	PND21	8.34e-06	7.58e-06	9.06e-06	7.92e-06	8.17e-06	6.04e-06	9.91e-06	5.79e-06	8.64e-06	1.013e-05	8.01e-06	4.69e-06	4.9e-06	4.41e-06	8.71e-06	4.62e-06	6.85e-06	5.2e-06	3.39e-06	3.43e-06	5.01e-06	7.56e-06	3.79e-06	7.03e-06	6.3e-06	4.05e-06	4.67e-06	5.7e-06	1.69e-06	4.11e-06	8.73e-06	6.76e-06	4.11e-06	5.81e-06	3.4e-06	1.009e-05	3.83e-06	4.626e-05	1.043e-05	4.992e-05	1.218e-05	5.58e-06	5.4e-06	6.02e-06	9.52e-06	6.06e-06	6.75e-06
382A	0.25	PND21	4.48e-06	9.6e-06	5.71e-06	4.12e-06	5.52e-06	4.98e-06	6.58e-06	8.12e-06	5.34e-06	7.38e-06	7.33e-06	5.3e-06	8.46e-06	5.49e-06	5.94e-06	6.43e-06	4.91e-06	5.17e-06	6.72e-06	1.015e-05	6.72e-06	6.03e-06	6.23e-06	6.43e-06	6.39e-06	1.02e-05	6.17e-06	5.32e-06	5.97e-06	3.59e-06	4.36e-06	5.11e-06	4.81e-06	5.83e-06	6.62e-06	3.4e-06	4.98e-06	1.092e-05	1.071e-05	9.086e-05	3.564e-05	6.45e-06	3.84e-06	6.09e-06	4.76e-06	6.04e-06	7.7e-06
400A	0.25	PND21	6.72e-06	3.23e-06	5.91e-06	5.13e-06	6.05e-06	5.44e-06	4.46e-06	4.82e-06	4.4e-06	6.4e-06	4.34e-06	6.59e-06	4.77e-06	8.69e-06	7.23e-06	4.83e-06	7.79e-06	6.04e-06	6.63e-06	5.68e-06	2.54e-06	4.06e-06	5.45e-06	4.24e-06	5.23e-06	5.72e-06	4.98e-06	7.36e-06	6.72e-06	5.85e-06	5.15e-06	3.13e-06	4.66e-06	5.07e-06	3.96e-06	6.48e-06	2.53e-06	1.328e-05	7e-06	3.888e-05	6.533e-05	5.27e-06	7.86e-06	7.09e-06	5.03e-06	6.87e-06	5.91e-06
435A	0.25	PND21	9.11e-06	6.7e-06	1.147e-05	1.048e-05	6.92e-06	6.95e-06	8.49e-06	1.047e-05	7.44e-06	8.83e-06	7.75e-06	1.162e-05	5.69e-06	6.24e-06	7.12e-06	7.79e-06	5.56e-06	8.14e-06	1.246e-05	7.76e-06	6.9e-06	6.63e-06	8.54e-06	6.07e-06	8.23e-06	1.069e-05	6.06e-06	1.057e-05	6.88e-06	6.74e-06	7.84e-06	6.28e-06	7.26e-06	3.73e-06	4.95e-06	9.53e-06	8.73e-06	3.596e-05	1.508e-05	7.781e-05	1.135e-05	9e-06	8.26e-06	5.95e-06	7.56e-06	9.27e-06	6.2e-06
1075A	0.25	PND21	7.06936e-06	5.82104e-06	3.47404e-06	5.67099e-06	3.95398e-06	6.03336e-06	5.6276e-06	6.12888e-06	6.15345e-06	3.33941e-06	5.02597e-06	3.66414e-06	4.98192e-06	7.20732e-06	7.04604e-06	6.94294e-06	5.23208e-06	2.90119e-06	3.87906e-06	7.13304e-06	4.64312e-06	7.77104e-06	5.62508e-06	8.33375e-06	6.5266e-06	6.91628e-06	4.15958e-06	5.19873e-06	3.42246e-06	5.14151e-06	5.56538e-06	5.60716e-06	6.23625e-06	7.34483e-06	5.93625e-06	5.07983e-06	5.48958e-06	2.36632e-05	1.68114e-05	0.00012565	5.90609e-06	4.69463e-06	7.1749e-06	8.14762e-06	4.01585e-06	7.65816e-06	3.477e-06
430A	0.25	PND21	6.6e-06	5.91e-06	4.16e-06	6.83e-06	4.32e-06	4.1e-06	5.96e-06	6.76e-06	6.51e-06	4.57e-06	4.97e-06	5.09e-06	7.05e-06	3.7e-06	4.41e-06	4.17e-06	3.94e-06	4.6e-06	4.96e-06	7.71e-06	6.83e-06	5.05e-06	6.42e-06	7.48e-06	7.23e-06	7.15e-06	6.04e-06	3.8e-06	4.42e-06	5.88e-06	7.84e-06	5.68e-06	7.49e-06	8.91e-06	5.58e-06	5.74e-06	4.72e-06	8.96e-06	1.343e-05	6.624e-05	7.58e-06	5.65e-06	7.08e-06	4.64e-06	6.08e-06	6.83e-06	4.29e-06
276B	0.25	PND50	5.02e-06	7.75e-06	3.27e-06	4.6e-06	4.98e-06	3.35e-06	3.8e-06	3.12e-06	5.06e-06	3.93e-06	3.71e-06	4.48e-06	3.91e-06	5.83e-06	3.87e-06	5.7e-06	3.88e-06	3.04e-06	5.72e-06	4.62e-06	3.84e-06	4.46e-06	3.29e-06	3.64e-06	5.78e-06	5.81e-06	3.65e-06	4.24e-06	5.63e-06	5.35e-06	4.39e-06	3.49e-06	3.42e-06	5.35e-06	4.36e-06	4.51e-06	6.24e-06	7.194e-05	2.099e-05	8.286e-05	6.58e-06	5.12e-06	5.48e-06	6.7e-06	6.56e-06	3.48e-06	2.85e-06
507B	0.25	PND50	4.83e-06	4.39e-06	6.08e-06	5.7e-06	7.19e-06	8.39e-06	6e-06	5.08e-06	2.86e-06	7e-06	4.43e-06	6.37e-06	7.41e-06	5.37e-06	8.92e-06	8.43e-06	5.37e-06	1.067e-05	5.46e-06	4.04e-06	6.96e-06	5.13e-06	6.26e-06	5.52e-06	4.37e-06	6.61e-06	5.52e-06	4.72e-06	6.5e-06	5.64e-06	6.74e-06	5.07e-06	5.99e-06	7.93e-06	7.62e-06	5.72e-06	7.82e-06	6.32e-05	2.323e-05	9.506e-05	1.251e-05	6.46e-06	3.96e-06	8.01e-06	5.63e-06	5.91e-06	5.15e-06
1340	0.25	PND50	3.92e-06	6.49e-06	6.48e-06	6.84e-06	8.15e-06	5.2e-06	6.57e-06	5.49e-06	5.26e-06	5.83e-06	3.3e-06	6.37e-06	6.46e-06	8.38e-06	5.54e-06	6.23e-06	5.72e-06	7.58e-06	5.66e-06	8.87e-06	3.75e-06	5.57e-06	6.06e-06	8.12e-06	1.009e-05	6.57e-06	6.47e-06	7.47e-06	7.58e-06	5.67e-06	5.79e-06	5.71e-06	6.42e-06	6.06e-06	6.8e-06	7.1e-06	8.14e-06	8.8e-06	1.491e-05	5.02e-05	4.78e-06	3.8e-06	4.66e-06	3.43e-06	6.25e-06	5.59e-06	5.14e-06
1067B	0.25	PND50	6.18e-06	5.25e-06	5.08e-06	3.97e-06	5.31e-06	6.94e-06	4.45e-06	4.17e-06	6.96e-06	4.42e-06	5.13e-06	4.85e-06	4.98e-06	4.83e-06	3e-06	5.77e-06	5.09e-06	7.25e-06	3.78e-06	9.3e-06	8.5e-06	6.04e-06	8.02e-06	5.1e-06	4.15e-06	6.12e-06	3.2e-06	5.62e-06	6.78e-06	3.82e-06	9.42e-06	4.51e-06	4.81e-06	5.35e-06	6.65e-06	5.96e-06	3.91e-06	3.363e-05	1.94e-05	6.171e-05	5.93e-06	3.28e-06	5.47e-06	5.63e-06	5.2e-06	2.55e-06	7.77e-06
1120B	0.25	PND50	5.53e-06	6.67e-06	5.35e-06	7.52e-06	6.35e-06	6.05e-06	5.44e-06	6.12e-06	7.41e-06	6.9e-06	6.68e-06	5.93e-06	5.04e-06	6.3e-06	7.29e-06	7.78e-06	7.79e-06	4.52e-06	7.1e-06	5.43e-06	5.69e-06	4.98e-06	4.15e-06	3.54e-06	4.49e-06	5.55e-06	6.66e-06	7.13e-06	9.9e-06	6.58e-06	5.1e-06	4.43e-06	7.3e-06	5.89e-06	5.33e-06	5.61e-06	5.02e-06	1.944e-05	2.121e-05	8.949e-05	6.1e-06	7.17e-06	7.78e-06	6.86e-06	3.52e-06	6.83e-06	1.028e-05
273B	0.25	PND50	7.31e-06	5.54e-06	6.75e-06	8.18e-06	6.12e-06	3.25e-06	5.53e-06	4.83e-06	8.44e-06	9.43e-06	8.13e-06	1.051e-05	5.23e-06	7.26e-06	4.17e-06	4.46e-06	5.56e-06	5.38e-06	4.89e-06	4.71e-06	7.28e-06	4.94e-06	5.33e-06	4.98e-06	4.83e-06	5.82e-06	7.2e-06	5.29e-06	5.62e-06	4.61e-06	4.95e-06	5.21e-06	6.56e-06	9.99e-06	5.18e-06	6.16e-06	5.3e-06	1.859e-05	7.77e-06	6.473e-05	1.275e-05	3.7e-06	6.21e-06	7.09e-06	6.28e-06	5.45e-06	4.95e-06
382B	0.25	PND50	5.84e-06	4.37e-06	2.7e-06	4.71e-06	7.29e-06	4.36e-06	5.81e-06	4.04e-06	3.95e-06	5.48e-06	4.19e-06	2.89e-06	7.05e-06	4.35e-06	3.29e-06	4.44e-06	5.91e-06	4.91e-06	6.34e-06	3.33e-06	8.67e-06	2.37e-06	9.2e-06	4.07e-06	8.31e-06	4.88e-06	4.17e-06	5.36e-06	3.79e-06	6.16e-06	6.63e-06	5.01e-06	5.05e-06	7.52e-06	4.23e-06	5.58e-06	5.93e-06	4.362e-05	1.361e-05	0.00010185	1.379e-05	5.41e-06	4.06e-06	5.63e-06	7.91e-06	6.27e-06	2.75e-06
400B	0.25	PND50	5.9e-06	5.69e-06	9.88e-06	7.07e-06	7.04e-06	9.83e-06	5.81e-06	7.51e-06	6.38e-06	6.28e-06	6.7e-06	6.92e-06	8.81e-06	7.63e-06	7.5e-06	6.13e-06	6.48e-06	6.09e-06	4.57e-06	9.32e-06	3.02e-06	6.99e-06	9.91e-06	7.75e-06	5.4e-06	8.17e-06	7.31e-06	7.55e-06	6.7e-06	1.025e-05	7.7e-06	4.83e-06	6.34e-06	8.72e-06	7.8e-06	5.95e-06	6.38e-06	6.679e-05	2.336e-05	8.935e-05	8.03e-06	8.16e-06	5.25e-06	5.06e-06	1.205e-05	7.54e-06	8.56e-06
435B	0.25	PND50	3.41e-06	6.8e-06	5.62e-06	2.71e-06	6.54e-06	7.02e-06	5.65e-06	8.6e-06	5.2e-06	3.27e-06	5.53e-06	4.2e-06	3.36e-06	5.62e-06	6.1e-06	3.91e-06	5.41e-06	7.96e-06	5.97e-06	3.94e-06	5.35e-06	4.01e-06	4.99e-06	5.21e-06	4.41e-06	3.54e-06	5.66e-06	8.76e-06	4.83e-06	5.55e-06	6.12e-06	4.82e-06	7e-06	9.39e-06	6.84e-06	4.47e-06	5.83e-06	2.095e-05	1.311e-05	0.00010562	1.208e-05	7.1e-06	6.3e-06	5.03e-06	5.19e-06	6.02e-06	6.96e-06
430B	0.25	PND50	9.17e-06	5.96e-06	4.42e-06	7.76e-06	6.51e-06	7.43e-06	8.88e-06	1.055e-05	8.69e-06	3.72e-06	7.93e-06	7.69e-06	8.42e-06	6.73e-06	9.42e-06	8.28e-06	8.48e-06	4.66e-06	7.21e-06	9.48e-06	7.55e-06	6.54e-06	1.073e-05	8.24e-06	1.364e-05	9.2e-06	6.79e-06	7.41e-06	6.75e-06	4.79e-06	8.21e-06	6.6e-06	5.04e-06	7.03e-06	5.7e-06	8.1e-06	5.38e-06	6.29e-06	1.277e-05	9.289e-05	1.12e-05	6e-06	8e-06	5.53e-06	7.03e-06	5.54e-06	1.095e-05
702	0.25	PND90	4.58e-06	5e-06	6.98e-06	4.48e-06	7.89e-06	6.88e-06	8.59e-06	8.37e-06	1.038e-05	8.56e-06	8.16e-06	8.52e-06	7.97e-06	1.09e-05	9.56e-06	6.7e-06	7.66e-06	7.39e-06	4.63e-06	4.78e-06	4.02e-06	7.69e-06	7.83e-06	5.25e-06	6.25e-06	5.12e-06	5.7e-06	6.39e-06	7.17e-06	6.37e-06	7.3e-06	8.52e-06	5.74e-06	4e-06	4.61e-06	8e-06	5.97e-06	4.034e-05	2.291e-05	0.00010482	1.054e-05	7.47e-06	6.71e-06	6.46e-06	4.94e-06	7.53e-06	9.13e-06
1055	0.25	PND90	6.83e-06	8.8e-06	5.46e-06	5.62e-06	7.12e-06	5.14e-06	6.43e-06	6.76e-06	5.49e-06	5.94e-06	7.16e-06	6.35e-06	8.26e-06	4.53e-06	6.96e-06	9.28e-06	7.03e-06	7.33e-06	8.07e-06	9.06e-06	2.65e-06	5.93e-06	6.93e-06	1.011e-05	5.56e-06	9.17e-06	6.51e-06	7.36e-06	8.26e-06	8.19e-06	6.91e-06	9.28e-06	8.49e-06	6.71e-06	7.56e-06	5.22e-06	4.22e-06	3.455e-05	3.014e-05	9.794e-05	9.98e-06	1.048e-05	6.95e-06	6.65e-06	8.53e-06	6.69e-06	4.8e-06
617	0.25	PND90	5.07e-06	7.67e-06	4.34e-06	5.24e-06	2.58e-06	5.36e-06	5.99e-06	4.97e-06	6.52e-06	4.57e-06	7.12e-06	7.13e-06	5e-06	6.31e-06	6.41e-06	8.85e-06	2.43e-06	4.23e-06	6.69e-06	5.42e-06	5.84e-06	5.68e-06	4.08e-06	4.19e-06	6.22e-06	4.01e-06	6.24e-06	3.47e-06	4.53e-06	6.45e-06	5.82e-06	8.39e-06	6.12e-06	4.3e-06	5.9e-06	6.83e-06	4.75e-06	4.27e-05	9e-06	3.897e-05	1.626e-05	4.58e-06	4.51e-06	7.13e-06	5.48e-06	7.83e-06	6.85e-06
729	0.25	PND90	7.59e-06	5.48e-06	9.09e-06	5.6e-06	6.02e-06	5.42e-06	1.013e-05	4.56e-06	3.97e-06	6.05e-06	4.12e-06	8.55e-06	6.73e-06	7.35e-06	6.92e-06	5.58e-06	7.52e-06	5.72e-06	5.68e-06	5.89e-06	6.89e-06	7.98e-06	5.68e-06	5.12e-06	6.17e-06	3.82e-06	4.06e-06	6.95e-06	7.72e-06	7.95e-06	8.23e-06	4.9e-06	5.28e-06	5.86e-06	5.94e-06	7.56e-06	7.61e-06	4.483e-05	1.524e-05	8.227e-05	8.37e-06	5.41e-06	7.24e-06	7.77e-06	8.21e-06	1.077e-05	8.37e-06
780	0.25	PND90	3.25e-06	9.19e-06	8.68e-06	3.79e-06	5.73e-06	6.89e-06	9.35e-06	5.54e-06	9.13e-06	9.02e-06	5.87e-06	9.1e-06	8.98e-06	8.83e-06	7.62e-06	4.44e-06	7.67e-06	6.67e-06	7.87e-06	7.65e-06	1.061e-05	5.57e-06	6.26e-06	6.98e-06	5.47e-06	8.74e-06	9.56e-06	6.6e-06	8.1e-06	6.83e-06	6.97e-06	3.93e-06	5.36e-06	1.138e-05	8.48e-06	6.23e-06	4.48e-06	5.449e-05	3.387e-05	0.00012942	8.59e-06	6.93e-06	7.71e-06	8.68e-06	7.07e-06	9.44e-06	8.86e-06
1146	0.25	PND90	6.43e-06	3.36e-06	7.59e-06	6.11e-06	8.58e-06	7.44e-06	6.08e-06	7.49e-06	6.08e-06	7.99e-06	6.03e-06	6.94e-06	5.56e-06	4.09e-06	5.34e-06	4.26e-06	6.55e-06	6.85e-06	7.52e-06	9.07e-06	6.08e-06	9.26e-06	4.95e-06	4.67e-06	5.9e-06	7.26e-06	7.53e-06	5.88e-06	8.15e-06	4.24e-06	3.48e-06	5.81e-06	5.59e-06	7.32e-06	9.24e-06	8.55e-06	9.46e-06	5.98e-06	9.11e-06	7.743e-05	1.523e-05	5.83e-06	9.74e-06	5.91e-06	6.03e-06	5.53e-06	6.51e-06
1149	0.25	PND90	7.31e-06	8.29e-06	4.03e-06	3.94e-06	5.37e-06	7.14e-06	7.8e-06	1.69e-06	3.94e-06	5.94e-06	7.75e-06	4.05e-06	5.65e-06	6.55e-06	9.88e-06	6.01e-06	5.24e-06	6.33e-06	5.73e-06	5.82e-06	5.64e-06	7.08e-06	8.19e-06	8.39e-06	5.7e-06	6.19e-06	5.23e-06	7.73e-06	8.72e-06	7.84e-06	1.218e-05	4.55e-06	4.54e-06	6.15e-06	5.52e-06	5.28e-06	7.56e-06	2.903e-05	7.53e-06	6.285e-05	3.814e-05	2.84e-06	6.41e-06	7.08e-06	6.25e-06	3.63e-06	8.62e-06
645	0.25	PND90	8.79e-06	5.01e-06	7.63e-06	8.18e-06	5.57e-06	5.26e-06	7.1e-06	5.39e-06	5.71e-06	6.61e-06	3.66e-06	5.42e-06	8.26e-06	6.87e-06	5.98e-06	6.82e-06	7.55e-06	8.03e-06	8.9e-06	7.86e-06	5.24e-06	5.49e-06	7.99e-06	8.98e-06	6.75e-06	5.01e-06	5.65e-06	5.69e-06	1.072e-05	8.55e-06	8.65e-06	5.47e-06	9.19e-06	6.9e-06	8.67e-06	5.14e-06	1.106e-05	1.444e-05	1.482e-05	9.135e-05	1.037e-05	5.22e-06	5.91e-06	8.77e-06	8.38e-06	1.077e-05	9.71e-06
430D	0.25	PND90	5.62e-06	8.55e-06	1.13e-05	4.63e-06	4.43e-06	2.99e-06	3.83e-06	6.37e-06	6.44e-06	8.23e-06	7.61e-06	7.79e-06	6.77e-06	6.89e-06	9.72e-06	5.15e-06	7.49e-06	6.88e-06	5.19e-06	7.68e-06	6.17e-06	5.04e-06	4.71e-06	4.36e-06	7.31e-06	6.11e-06	2.64e-06	8.92e-06	6.5e-06	4.4e-06	7.99e-06	4.3e-06	7.71e-06	6.44e-06	4.22e-06	7.92e-06	7.22e-06	3.625e-05	1.253e-05	8.03e-05	1.222e-05	7.35e-06	5.65e-06	5.17e-06	4.43e-06	3.63e-06	7.3e-06
748	0.25	PND90	6.97e-06	9.68e-06	7.04e-06	5.58e-06	3.66e-06	4.85e-06	5.9e-06	5.61e-06	7.5e-06	6.52e-06	6.86e-06	5.07e-06	4.02e-06	7.26e-06	4.85e-06	7.05e-06	5.1e-06	7.67e-06	4.27e-06	4.54e-06	2.72e-06	9.53e-06	7.49e-06	4.35e-06	3.58e-06	3.74e-06	7.58e-06	6.73e-06	3.59e-06	3.19e-06	3.56e-06	5.56e-06	3.47e-06	4.9e-06	4.87e-06	6.98e-06	5.57e-06	1.455e-05	7.66e-06	5.776e-05	2.144e-05	8.56e-06	7.02e-06	7.62e-06	3.72e-06	6.18e-06	5.4e-06
728	0.25	PND140	5.36e-06	5.33e-06	7.69e-06	5e-06	5.16e-06	6.21e-06	5.21e-06	7.64e-06	4.02e-06	2.97e-06	5.92e-06	5.25e-06	4.69e-06	2.76e-06	4.19e-06	4.23e-06	6.45e-06	4.31e-06	4.23e-06	6.31e-06	4.73e-06	5.14e-06	3.69e-06	5.25e-06	3.83e-06	5.75e-06	6.35e-06	5.57e-06	5.61e-06	4.42e-06	5.63e-06	5.76e-06	9.68e-06	5.57e-06	6.52e-06	4.65e-06	4.71e-06	2.401e-05	9.78e-06	6.078e-05	3.761e-05	4.55e-06	4.83e-06	4.74e-06	7.85e-06	7.81e-06	5.76e-06
1054	0.25	PND140	6.96e-06	6.05e-06	7.57e-06	9.29e-06	3.45e-06	6.84e-06	7.13e-06	5.6e-06	1.031e-05	4.77e-06	5.96e-06	4.52e-06	4.26e-06	6.62e-06	3.66e-06	5.36e-06	6.32e-06	7.18e-06	4.84e-06	5.67e-06	5.5e-06	6.56e-06	5.13e-06	4.51e-06	3.94e-06	6.01e-06	5.56e-06	7.41e-06	6.78e-06	6.14e-06	4.56e-06	4.17e-06	5.52e-06	5.27e-06	6.6e-06	5.94e-06	4.17e-06	7.92e-06	1.029e-05	7.218e-05	5.84e-06	4.48e-06	6.98e-06	4.74e-06	7.5e-06	7.57e-06	4.16e-06
616	0.25	PND140	6.06e-06	7.28e-06	5.86e-06	5.57e-06	4.22e-06	5.12e-06	5.88e-06	5.14e-06	5.42e-06	4.3e-06	3.21e-06	3.3e-06	4.43e-06	5.4e-06	4.37e-06	6.5e-06	6.88e-06	4.71e-06	5.15e-06	5.93e-06	4.57e-06	6.55e-06	7.13e-06	4.02e-06	6.57e-06	4.61e-06	1.056e-05	5.05e-06	4.73e-06	5.42e-06	4.94e-06	3.18e-06	4.31e-06	4.13e-06	9.79e-06	4.15e-06	5.9e-06	2.969e-05	8.98e-06	8.574e-05	1.379e-05	5.46e-06	4.85e-06	4.48e-06	5.55e-06	6.37e-06	7.15e-06
644	0.25	PND140	7.04e-06	5.01e-06	6.61e-06	5.8e-06	6.64e-06	7.26e-06	7.96e-06	4.55e-06	2.88e-06	5.1e-06	4.59e-06	4.9e-06	4.88e-06	5.14e-06	5.65e-06	5.21e-06	3.68e-06	6.12e-06	2.14e-06	6.15e-06	4.45e-06	6.21e-06	4.26e-06	5.46e-06	2.38e-06	3.57e-06	8.54e-06	3.09e-06	6.22e-06	4.22e-06	4.19e-06	3.93e-06	4.05e-06	6e-06	4.37e-06	4.57e-06	4.16e-06	1.93e-05	7.4e-06	9.163e-05	1.647e-05	6.53e-06	6.51e-06	6.23e-06	4.98e-06	8.05e-06	4.01e-06
781	0.25	PND140	7.83e-06	7.35e-06	4.79e-06	7.84e-06	4.38e-06	7.26e-06	7.69e-06	5.45e-06	5.4e-06	4.48e-06	6.08e-06	4.96e-06	5.03e-06	4.48e-06	6.16e-06	7.6e-06	4.38e-06	4.62e-06	9.16e-06	5.4e-06	4.75e-06	4.22e-06	6.28e-06	6.45e-06	6.43e-06	8.06e-06	4.69e-06	6.15e-06	1.006e-05	7.29e-06	6.19e-06	4.4e-06	1.139e-05	1.012e-05	4.87e-06	4.23e-06	5.28e-06	8.53e-06	1.083e-05	6.85e-05	5.17e-06	9.57e-06	1.023e-05	6.24e-06	8.64e-06	1.107e-05	6.34e-06
430E	0.25	PND140	5.21e-06	7.8e-06	5.73e-06	4.54e-06	4.82e-06	5.31e-06	6.15e-06	8.25e-06	6.97e-06	7.35e-06	7.09e-06	4.18e-06	5.08e-06	2.77e-06	5.95e-06	3.82e-06	5.94e-06	5.99e-06	7.11e-06	6e-06	5.84e-06	7.34e-06	7.25e-06	3.98e-06	6.96e-06	5.88e-06	5.39e-06	3.89e-06	4.12e-06	3.62e-06	6.95e-06	6.28e-06	3.04e-06	4.6e-06	6.64e-06	5.27e-06	4.43e-06	2.954e-05	1.301e-05	8.211e-05	2.602e-05	4.54e-06	6.86e-06	4.82e-06	3.75e-06	6.02e-06	7.81e-06
747	0.25	PND140	3.86e-06	3.87e-06	3.52e-06	5.34e-06	5.52e-06	6.79e-06	4.41e-06	3.21e-06	4.95e-06	5.68e-06	4.17e-06	4.05e-06	4.92e-06	6.46e-06	3.68e-06	5.66e-06	4.23e-06	4.7e-06	3.97e-06	4.69e-06	7.17e-06	5.34e-06	3.89e-06	4.29e-06	8.08e-06	7.87e-06	3.41e-06	9.24e-06	7.12e-06	3.85e-06	2.66e-06	4.73e-06	6.14e-06	4.86e-06	4.38e-06	5.51e-06	4.82e-06	6.68e-06	5.14e-06	4.505e-05	1.149e-05	4.22e-06	5.53e-06	3.39e-06	5.18e-06	4.76e-06	4.97e-06
779	0.25	PND200	5.7e-06	5.78e-06	6.18e-06	5.61e-06	8.85e-06	5.66e-06	5.07e-06	7.14e-06	7.71e-06	8.95e-06	5.73e-06	6.3e-06	5.63e-06	8.54e-06	7.06e-06	6.65e-06	6.32e-06	6.51e-06	8.64e-06	8.53e-06	4.88e-06	5.48e-06	4.55e-06	7.91e-06	4.97e-06	3.53e-06	6.9e-06	4.13e-06	8.86e-06	7.78e-06	7.86e-06	6.9e-06	6.77e-06	6.63e-06	1.129e-05	8.8e-06	4.88e-06	6.91e-06	1.134e-05	5.158e-05	2.809e-05	7.63e-06	7.71e-06	1.065e-05	8.94e-06	4.56e-06	4.4e-06
615	0.25	PND200	4.38e-06	4.82e-06	3.93e-06	5.05e-06	7.35e-06	6.19e-06	4.53e-06	5.7e-06	6.01e-06	6.58e-06	4.77e-06	5.39e-06	6.99e-06	5.9e-06	4.25e-06	6.71e-06	4.94e-06	7.37e-06	5.53e-06	5.8e-06	3.9e-06	5.72e-06	5.58e-06	4.32e-06	8.2e-06	5.6e-06	6.37e-06	5.57e-06	6.15e-06	6.34e-06	5.21e-06	5.19e-06	4.47e-06	4.67e-06	7.9e-06	4.04e-06	4.51e-06	1.152e-05	1.337e-05	9.88e-05	8.78e-06	1.181e-05	4.58e-06	6.81e-06	6.91e-06	5.29e-06	8.56e-06
759	0.25	PND200	6.67e-06	8.99e-06	5.91e-06	6.49e-06	5.3e-06	4.69e-06	5.41e-06	8.2e-06	4.86e-06	7.84e-06	3.49e-06	5.39e-06	6.92e-06	4.36e-06	4.39e-06	4.21e-06	5.25e-06	3.33e-06	5.24e-06	7.03e-06	4.55e-06	5.11e-06	7.98e-06	7.02e-06	4.17e-06	4.59e-06	8.67e-06	5.84e-06	3.33e-06	3.43e-06	6.74e-06	3.34e-06	5.9e-06	4.63e-06	4.72e-06	7.67e-06	7.65e-06	3.153e-05	1.045e-05	8.469e-05	2.104e-05	4.04e-06	7.5e-07	3.19e-06	3.86e-06	2.91e-06	5.69e-06
643	0.25	PND200	7.78114e-06	9.65979e-06	5.49019e-06	4.65198e-06	4.17759e-06	6.31232e-06	2.94893e-06	9.29416e-06	4.47748e-06	3.41847e-06	5.99981e-06	5.45698e-06	9.60597e-06	6.00191e-06	2.72905e-06	8.4612e-06	5.03547e-06	7.54306e-06	5.89457e-06	2.85232e-06	5.72015e-06	5.6488e-06	7.13422e-06	6.96435e-06	8.37363e-06	5.14629e-06	1.00253e-05	6.90856e-06	6.70007e-06	4.5812e-06	7.1445e-06	6.31262e-06	1.01572e-05	7.2621e-06	5.40655e-06	9.70654e-06	5.6198e-06	1.5145e-05	1.82362e-05	0.000106852	9.1484e-06	7.43483e-06	6.47611e-06	9.00206e-06	6.91775e-06	7.63452e-06	4.13956e-06
699	0.25	PND200	7.16e-06	6.4e-06	5.72e-06	3.18e-06	5.12e-06	5.82e-06	8.25e-06	3.66e-06	6.02e-06	6.51e-06	6.63e-06	4.3e-06	4.03e-06	8.37e-06	5.16e-06	8.51e-06	4.06e-06	7.76e-06	5.9e-06	5.6e-06	6.74e-06	8.05e-06	6.01e-06	7.46e-06	6.34e-06	6.04e-06	7.8e-06	5.04e-06	5.92e-06	3.1e-06	8.02e-06	5.43e-06	5.12e-06	6.35e-06	5.5e-06	7.1e-06	6.32e-06	3.778e-05	9.5e-06	7.883e-05	4.153e-05	4.42e-06	7.78e-06	6.01e-06	8.73e-06	7.77e-06	7e-06
746	0.25	PND200	1.123e-05	6.3e-06	6.82e-06	5.94e-06	8.72e-06	7.61e-06	6.34e-06	5.43e-06	3.25e-06	6.37e-06	7.12e-06	6.46e-06	5.78e-06	7.13e-06	1.015e-05	6.54e-06	9.41e-06	7.42e-06	7.88e-06	7.39e-06	8.55e-06	8.65e-06	5.08e-06	5.32e-06	1.053e-05	9.58e-06	7.24e-06	4.74e-06	7.92e-06	1.135e-05	5.26e-06	1.14e-05	5.12e-06	8.01e-06	5.95e-06	5.59e-06	8.62e-06	1.208e-05	6.82e-06	7.649e-05	1.28e-05	7.1e-06	7.06e-06	6.47e-06	4.3e-06	6.45e-06	9.46e-06
1053	0.25	PND200	3.55e-06	5.27e-06	3.83e-06	5.27e-06	4.78e-06	2.71e-06	4.93e-06	7.33e-06	4.97e-06	4.16e-06	6.71e-06	4.8e-06	3.34e-06	4.63e-06	5.6e-06	6.25e-06	6.57e-06	6.04e-06	8.64e-06	5.7e-06	3.94e-06	5.99e-06	4.03e-06	7.2e-06	5.89e-06	4.85e-06	6.06e-06	3.39e-06	3.41e-06	4.65e-06	6.04e-06	3.81e-06	6.61e-06	4.23e-06	7.05e-06	5.66e-06	5.2e-06	2.668e-05	6.42e-06	3.547e-05	3.535e-05	5.9e-06	8.03e-06	8.2e-06	5.32e-06	4.32e-06	8.47e-06
1148	0.25	PND200	5.66e-06	7.06e-06	5.87e-06	6.52e-06	5.01e-06	4.44e-06	5.25e-06	9.53e-06	5.29e-06	7.07e-06	5.93e-06	6.19e-06	5.51e-06	7.8e-06	6.67e-06	5.02e-06	2.86e-06	5.26e-06	6.63e-06	5.28e-06	6.43e-06	6.96e-06	6.73e-06	5.98e-06	6.29e-06	5.5e-06	2.64e-06	7.6e-06	8.03e-06	1.117e-05	3.36e-06	7.76e-06	6.55e-06	6.76e-06	5.4e-06	8.34e-06	4.94e-06	2.792e-05	1.231e-05	0.00013337	1.906e-05	8.47e-06	4.72e-06	5.97e-06	5.66e-06	9.37e-06	6.49e-06
1302	0.25	PND200	9.61e-06	1.049e-05	8.5e-06	1.041e-05	4.87e-06	7.92e-06	7.04e-06	4.4e-06	8.97e-06	6.19e-06	7.22e-06	4.17e-06	1.163e-05	5.99e-06	8.63e-06	8.42e-06	4.4e-06	4.41e-06	4.51e-06	4.9e-06	1.035e-05	6.47e-06	7.13e-06	6.38e-06	5.99e-06	8.06e-06	4.84e-06	6.87e-06	6.92e-06	5.56e-06	8.84e-06	9.21e-06	5.34e-06	9.56e-06	7.8e-06	7.46e-06	9.14e-06	3.357e-05	1.025e-05	7.841e-05	2.752e-05	9.07e-06	5.43e-06	8.27e-06	5.17e-06	1.307e-05	9.64e-06
727	0.25	PND200	3.7e-06	9.65e-06	9.25e-06	5.75e-06	5.71e-06	7.72e-06	7.14e-06	8.43e-06	7.04e-06	1.111e-05	1.095e-05	8.86e-06	4.61e-06	5.04e-06	6.38e-06	4.74e-06	3.94e-06	9.17e-06	5.35e-06	7.09e-06	6.06e-06	5.59e-06	3.56e-06	8.22e-06	9.51e-06	5.13e-06	1.199e-05	5.79e-06	9.17e-06	1.163e-05	6.37e-06	5.75e-06	5.6e-06	5.51e-06	8.73e-06	4.91e-06	7.78e-06	2.383e-05	8.82e-06	8.792e-05	1.236e-05	6.18e-06	8.76e-06	9.2e-06	8.2e-06	1.108e-05	8.49e-06
221A	2.5	PND21	4.85e-06	6.88e-06	6.28e-06	5.77e-06	7.56e-06	5.94e-06	5.64e-06	4.8e-06	5.42e-06	4.83e-06	4.3e-06	5.35e-06	2.08e-06	5.64e-06	3.81e-06	4.23e-06	5.62e-06	6.33e-06	4.98e-06	6.46e-06	8.36e-06	7.18e-06	6.63e-06	5.21e-06	5.76e-06	4.38e-06	6.24e-06	3.45e-06	6.71e-06	5.98e-06	6.97e-06	3.08e-06	5.05e-06	8.21e-06	6.6e-06	3.93e-06	5.65e-06	6.48e-06	4.14e-06	3.11e-05	4.406e-05	2.88e-06	4.91e-06	6.73e-06	5.42e-06	4.03e-06	8.78e-06
398A	2.5	PND21	7.59e-06	7.46e-06	5.82e-06	4.95e-06	4.72e-06	5.85e-06	6.5e-06	6.11e-06	6.67e-06	8.51e-06	4.97e-06	6.57e-06	5.66e-06	2.55e-06	5.81e-06	8.61e-06	9.21e-06	7.17e-06	5.14e-06	6.19e-06	3.8e-06	6.89e-06	6.98e-06	8.41e-06	7.17e-06	6.34e-06	6.81e-06	6.11e-06	4.97e-06	5.93e-06	6.23e-06	7.07e-06	3.25e-06	5.7e-06	4.22e-06	5.82e-06	4.68e-06	3.189e-05	1.129e-05	0.00013369	2.489e-05	6.59e-06	5.41e-06	2.16e-06	7.48e-06	7.63e-06	4.83e-06
570A	2.5	PND21	6.14e-06	4.02e-06	6.23e-06	5.97e-06	6.62e-06	4.04e-06	5.31e-06	4.05e-06	5.94e-06	7.67e-06	7.06e-06	5.35e-06	4.47e-06	7.71e-06	4.22e-06	6.63e-06	6.25e-06	4.43e-06	7.9e-06	6.52e-06	6.09e-06	4.66e-06	1.83e-06	4.25e-06	6.46e-06	4.18e-06	6.51e-06	5.1e-06	3.1e-06	5.89e-06	5.79e-06	5.05e-06	4.06e-06	3.55e-06	3.29e-06	4.57e-06	6.79e-06	8.04e-06	3.82e-06	5.817e-05	2.868e-05	6.58e-06	6.81e-06	5.71e-06	3.79e-06	4.18e-06	6.49e-06
1074A	2.5	PND21	7.97e-06	4.23e-06	7.45e-06	5.21e-06	4.25e-06	5.04e-06	6.64e-06	6.15e-06	3.57e-06	5.97e-06	7.55e-06	1.126e-05	9.76e-06	8.24e-06	7.73e-06	4.75e-06	7.41e-06	7.43e-06	7.62e-06	7.48e-06	5.03e-06	7.36e-06	5.84e-06	4.88e-06	5.3e-06	5.01e-06	1.019e-05	5.34e-06	4.08e-06	6.18e-06	6.99e-06	4.86e-06	5.78e-06	5.2e-06	6.98e-06	5.08e-06	4.36e-06	2.66e-05	3.3e-05	7.722e-05	7.61e-06	7e-06	5.33e-06	4.9e-06	5.63e-06	6.73e-06	4.01e-06
486A	2.5	PND21	4.79321e-06	7.27415e-06	7.67791e-06	8.45616e-06	7.22497e-06	7.9496e-06	9.07246e-06	5.21527e-06	1.18852e-05	9.4987e-06	5.79241e-06	7.80181e-06	5.87271e-06	6.08298e-06	7.15274e-06	5.32048e-06	8.6644e-06	8.26779e-06	7.88722e-06	8.2329e-06	5.81982e-06	6.9101e-06	8.71891e-06	9.8873e-06	3.40357e-06	6.61159e-06	5.6994e-06	7.75123e-06	7.02468e-06	1.01649e-05	6.92155e-06	6.96395e-06	3.76247e-06	8.41096e-06	2.24565e-06	9.22926e-06	7.9485e-06	4.42346e-05	1.46221e-05	7.41884e-05	1.47713e-05	5.99204e-06	8.01873e-06	4.18548e-06	4.80665e-06	1.01893e-05	3.69467e-06
495A	2.5	PND21	5.89e-06	4.26e-06	4.28e-06	2.9e-06	5.07e-06	4.02e-06	3.7e-06	5.31e-06	4.56e-06	2.74e-06	5.77e-06	3.2e-06	5.66e-06	5.72e-06	7.72e-06	3.18e-06	3.49e-06	3.22e-06	3.55e-06	3.76e-06	3.97e-06	3.94e-06	6.16e-06	3.73e-06	4.26e-06	4.22e-06	5.08e-06	3.4e-06	5.01e-06	3.8e-06	3.86e-06	3.78e-06	3.48e-06	4.38e-06	4.82e-06	6.49e-06	2.35e-06	6.343e-05	2.262e-05	6.65e-05	5.06e-06	3.21e-06	5.87e-06	4.49e-06	5.01e-06	4.55e-06	4.57e-06
1084B	2.5	PND50	6.63e-06	9.96e-06	3.3e-06	8.32e-06	7.65e-06	6.26e-06	8.2e-06	6.94e-06	5.4e-06	8.85e-06	7.8e-06	8.61e-06	5.89e-06	6.36e-06	7.45e-06	1.062e-05	1.09e-05	6.02e-06	8.08e-06	4.51e-06	8.45e-06	9.6e-06	8.7e-06	4.98e-06	6.6e-06	6.98e-06	8.25e-06	6.35e-06	8.48e-06	5.23e-06	8.31e-06	6.6e-06	1.128e-05	5.57e-06	6.81e-06	8.24e-06	5.74e-06	1.579e-05	1.699e-05	6.81e-05	5.37e-06	1.206e-05	4.11e-06	6.59e-06	6.53e-06	9.11e-06	7.79e-06
1122B	2.5	PND50	3.95e-06	2.95e-06	6.17e-06	5.38e-06	4.47e-06	7.67e-06	9.44e-06	1.011e-05	7.47e-06	9.49e-06	6.27e-06	6.84e-06	6.3e-06	6.05e-06	8.55e-06	9.33e-06	4.85e-06	1.301e-05	7.84e-06	7.49e-06	6.99e-06	8.43e-06	6.48e-06	9.75e-06	7.03e-06	7.87e-06	7.52e-06	6.68e-06	1.281e-05	1.132e-05	8.58e-06	5.94e-06	3.98e-06	5.43e-06	7.3e-06	7.64e-06	7.34e-06	1.539e-05	7.69e-06	4.941e-05	1.044e-05	6.6e-06	1.004e-05	7.73e-06	9.18e-06	6.51e-06	5.79e-06
398B	2.5	PND50	6.73e-06	8.3e-06	4.98e-06	4.16e-06	3.34e-06	8.99e-06	6.03e-06	7.39e-06	9.22e-06	1.027e-05	5.72e-06	5.97e-06	7.26e-06	7.18e-06	1.229e-05	4.12e-06	5.65e-06	5.49e-06	9.88e-06	8.9e-06	5.19e-06	5.68e-06	6.49e-06	5.48e-06	7.66e-06	9.09e-06	8.78e-06	8.13e-06	1.062e-05	9.58e-06	1.057e-05	5.38e-06	7.59e-06	6.65e-06	8.7e-06	9.5e-06	5.42e-06	2.164e-05	1.928e-05	9.735e-05	9.52e-06	4.47e-06	6.75e-06	6.34e-06	6.11e-06	6.16e-06	7.95e-06
454B	2.5	PND50	5.65e-06	7.03e-06	5.17e-06	5.45e-06	4.74e-06	8.3e-06	8.82e-06	9.24e-06	5.45e-06	7.55e-06	6.8e-06	5.01e-06	6.31e-06	7.12e-06	4.18e-06	7.1e-06	4.92e-06	6.62e-06	5.96e-06	4.69e-06	7.9e-06	1.214e-05	1e-05	8.17e-06	5.85e-06	9.6e-06	6.61e-06	1.11e-05	6.73e-06	6.79e-06	5.48e-06	6.17e-06	8.02e-06	4.72e-06	9.25e-06	4.16e-06	5.95e-06	3.151e-05	1.678e-05	9.441e-05	1.007e-05	7.08e-06	1.072e-05	5.24e-06	8.21e-06	8.47e-06	1.157e-05
1342	2.5	PND50	6.46e-06	5.28e-06	4.96e-06	8.35e-06	4.91e-06	8.45e-06	8.97e-06	3.87e-06	7.16e-06	4.91e-06	4.35e-06	6.98e-06	4.39e-06	3.45e-06	5.99e-06	5.73e-06	6.24e-06	4.44e-06	9.57e-06	5.8e-06	9.41e-06	6.66e-06	6.39e-06	7.01e-06	6.23e-06	5.91e-06	7.07e-06	6.1e-06	7.34e-06	5.77e-06	6.97e-06	5.51e-06	7.68e-06	4.42e-06	4.87e-06	8.96e-06	5.67e-06	4.049e-05	1.29e-05	6.872e-05	9.16e-06	6.07e-06	8.06e-06	3.2e-06	8e-06	7.33e-06	4.51e-06
1074B	2.5	PND50	3.54e-06	4.92e-06	5.89e-06	7.05e-06	5.55e-06	4.16e-06	4.88e-06	6.7e-06	7.14e-06	4.9e-06	4.73e-06	8.53e-06	6.66e-06	7.06e-06	3.24e-06	6.95e-06	5.61e-06	5.64e-06	6.85e-06	6.58e-06	7.64e-06	5.68e-06	6.6e-06	4.83e-06	3.49e-06	3.83e-06	3.69e-06	5.05e-06	5.46e-06	5.37e-06	4.87e-06	3.19e-06	5.62e-06	8.12e-06	7.23e-06	4.03e-06	5.4e-06	2.416e-05	1.165e-05	6.769e-05	2.362e-05	6.28e-06	6.45e-06	3.19e-06	5.72e-06	4.07e-06	5.18e-06
221B	2.5	PND50	9.25e-06	5.88e-06	9.66e-06	4.62e-06	8.65e-06	5.73e-06	6.08e-06	8.01e-06	6.65e-06	5.63e-06	5.66e-06	7.06e-06	6.51e-06	1.106e-05	5.04e-06	7.2e-06	9.48e-06	7.11e-06	7.38e-06	6.4e-06	3.87e-06	5.64e-06	5.78e-06	7.24e-06	5.73e-06	5.56e-06	6.81e-06	7.02e-06	1.045e-05	1.172e-05	5.33e-06	3.8e-06	5.46e-06	6.73e-06	9.35e-06	7.86e-06	7.15e-06	3.751e-05	1.485e-05	8.463e-05	8.72e-06	5.4e-06	1.147e-05	6.71e-06	6.22e-06	4.9e-06	4.57e-06
486B	2.5	PND50	6.45e-06	6.88e-06	7.76e-06	6.01e-06	6.81e-06	7.61e-06	5.02e-06	9.08e-06	6.04e-06	5.31e-06	6.73e-06	1.014e-05	7.7e-06	8.29e-06	6.78e-06	4.11e-06	5.24e-06	5.17e-06	8.3e-06	8.57e-06	7.26e-06	9.33e-06	5.78e-06	7.63e-06	7e-06	8.08e-06	7.63e-06	4.71e-06	8.52e-06	6.85e-06	5.63e-06	1.017e-05	6.06e-06	7.28e-06	4.12e-06	6.54e-06	5.51e-06	4.258e-05	2.53e-05	9.195e-05	6.41e-06	4.83e-06	7.58e-06	4.58e-06	5.63e-06	5.86e-06	8.75e-06
495B	2.5	PND50	7.06e-06	5.3e-06	1.009e-05	4.88e-06	4.01e-06	1.069e-05	7.53e-06	1.018e-05	6.46e-06	6.5e-06	6.28e-06	5.81e-06	1.393e-05	6.53e-06	7.68e-06	6.4e-06	4.15e-06	6.37e-06	9.46e-06	6.54e-06	5.53e-06	3.03e-06	5.24e-06	6.36e-06	1.93e-06	7.69e-06	6.73e-06	7.57e-06	6.96e-06	1.003e-05	8.28e-06	9.77e-06	6.17e-06	8.03e-06	6.9e-06	7.44e-06	6.97e-06	7.34e-06	1.162e-05	7.251e-05	9.64e-06	7.68e-06	8.61e-06	7.65e-06	3.72e-06	5.48e-06	9.06e-06
570B	2.5	PND50	7.32e-06	5.9e-06	6.06e-06	7.27e-06	4.44e-06	3.84e-06	4.3e-06	5.2e-06	5.05e-06	7.83e-06	6.81e-06	5.35e-06	3.26e-06	6.3e-06	4.28e-06	5.21e-06	4.68e-06	5.71e-06	5.49e-06	7.96e-06	5.43e-06	8.16e-06	7.55e-06	8e-06	5.47e-06	5.73e-06	6.61e-06	9.5e-06	1.083e-05	6.3e-06	5.11e-06	4.2e-06	7.94e-06	7.51e-06	5.57e-06	5.16e-06	4.71e-06	2.066e-05	1.003e-05	7.975e-05	1.037e-05	5.23e-06	4.53e-06	1.01e-05	7.43e-06	8.1e-06	7.73e-06
1050	2.5	PND90	8.18e-06	5.74e-06	4.91e-06	4.7e-06	5.94e-06	4.42e-06	4.99e-06	4.3e-06	5.65e-06	4.5e-06	2.89e-06	7.66e-06	5.14e-06	6.61e-06	4.04e-06	7.5e-06	5.93e-06	4.31e-06	5.16e-06	4.63e-06	5.95e-06	5.61e-06	4.94e-06	8.81e-06	5.84e-06	4.34e-06	6.42e-06	6.49e-06	3.46e-06	6.95e-06	4.69e-06	7.38e-06	5.43e-06	1.95e-06	3.43e-06	3.95e-06	4.69e-06	3.322e-05	1.054e-05	6.817e-05	4.19e-05	4.3e-06	5.31e-06	4.65e-06	3.26e-06	4.46e-06	7.16e-06
486D	2.5	PND90	6e-06	5.07e-06	3.22e-06	3.26e-06	4.47e-06	5.21e-06	6.72e-06	3e-06	3.32e-06	5.58e-06	3.57e-06	3.73e-06	4.66e-06	3.35e-06	4.84e-06	4.04e-06	3.88e-06	3.24e-06	5.94e-06	4.64e-06	4.05e-06	5.06e-06	4.58e-06	3.39e-06	5.23e-06	6.64e-06	4.85e-06	3.39e-06	3.99e-06	5.39e-06	2.46e-06	3.39e-06	3.35e-06	4.92e-06	3.26e-06	2.65e-06	3.37e-06	4.437e-05	1.647e-05	5.416e-05	1.147e-05	4.28e-06	4.81e-06	3.63e-06	3.14e-06	3.62e-06	3.86e-06
691	2.5	PND90	5.14e-06	4.64e-06	5.26e-06	5.68e-06	7.09e-06	4.57e-06	6.88e-06	6.21e-06	9.91e-06	6.1e-06	4.66e-06	6.48e-06	6.17e-06	5.27e-06	4.63e-06	9.24e-06	6.01e-06	6.89e-06	7.28e-06	5.31e-06	2.64e-06	2.72e-06	6.41e-06	6.9e-06	6.01e-06	6.36e-06	6.28e-06	5.46e-06	7.81e-06	6.63e-06	5.71e-06	3.86e-06	5.39e-06	7.21e-06	5.66e-06	3.71e-06	7.29e-06	2.181e-05	9.53e-06	7.493e-05	9.53e-06	5.08e-06	6.89e-06	7.32e-06	7.1e-06	5.85e-06	7.99e-06
733	2.5	PND90	7.61e-06	4.59e-06	4.4e-06	7.27e-06	3.59e-06	5.11e-06	7.29e-06	3.99e-06	5.83e-06	5.14e-06	6.04e-06	7.56e-06	8.07e-06	4.56e-06	4.84e-06	6.1e-06	4.56e-06	8.1e-06	6.25e-06	4.98e-06	8.54e-06	9.78e-06	6.96e-06	4.21e-06	5.82e-06	5.67e-06	8.82e-06	4.5e-06	6.53e-06	5.01e-06	5.38e-06	8.99e-06	1.27e-06	6.81e-06	6.4e-06	7.44e-06	7.77e-06	3.106e-05	1.115e-05	6.944e-05	7.94e-06	5.14e-06	5.68e-06	6.62e-06	6.33e-06	7.08e-06	7.18e-06
454D	2.5	PND90	3.66e-06	4.76e-06	5.63e-06	6.12e-06	3.84e-06	6.96e-06	5.22e-06	7.41e-06	3.99e-06	6.04e-06	5.97e-06	6.27e-06	8.58e-06	3.75e-06	8.42e-06	8.99e-06	5.21e-06	5.92e-06	2.14e-06	4.86e-06	4.43e-06	3.33e-06	2.84e-06	6.56e-06	7.2e-06	2.78e-06	3.51e-06	5.29e-06	5.38e-06	7.43e-06	6.1e-06	3.78e-06	7.23e-06	7.33e-06	5.41e-06	5.76e-06	7.04e-06	5.92e-06	8.09e-06	6.665e-05	2.955e-05	4.73e-06	5.13e-06	4.61e-06	3.87e-06	4.11e-06	8.42e-06
649	2.5	PND90	3.48e-06	5.23e-06	7.62e-06	4.57e-06	5.85e-06	4.01e-06	5.2e-06	4.68e-06	5.24e-06	5.67e-06	3.28e-06	6.46e-06	5.43e-06	3.59e-06	4.14e-06	4.49e-06	6.73e-06	8.01e-06	6.66e-06	6.17e-06	5.56e-06	6.18e-06	4.82e-06	5.07e-06	6.14e-06	6.24e-06	5.32e-06	6.61e-06	7.74e-06	6.44e-06	4.12e-06	5.16e-06	7.2e-06	4.65e-06	3.25e-06	4.38e-06	5.82e-06	2.574e-05	2.08e-05	8.528e-05	5.56e-06	5.6e-06	5.94e-06	6.04e-06	7.31e-06	5.21e-06	3.67e-06
657	2.5	PND90	6.53e-06	2.71e-06	5.26e-06	5.99e-06	4.45e-06	4.78e-06	7.04e-06	7.76e-06	8.59e-06	7.21e-06	7.52e-06	5.79e-06	4.1e-06	4.26e-06	6.38e-06	3.57e-06	7.69e-06	6.75e-06	7.04e-06	4.43e-06	4.15e-06	4.78e-06	5.83e-06	8.27e-06	5.76e-06	5.6e-06	6.03e-06	5.26e-06	5.87e-06	4.57e-06	5.89e-06	8.67e-06	6.19e-06	5.3e-06	6.58e-06	4.85e-06	5.37e-06	2.022e-05	1.362e-05	0.0001017	9.58e-06	5.16e-06	5.34e-06	5.56e-06	7.65e-06	6.3e-06	4.63e-06
994	2.5	PND90	8.54e-06	7e-06	6.99e-06	1.84e-06	4.98e-06	7.05e-06	5.76e-06	4.67e-06	6.63e-06	3.97e-06	1.097e-05	6.21e-06	3.7e-06	6.31e-06	4.3e-06	4.3e-06	5.35e-06	4.41e-06	5.38e-06	6.6e-06	6.87e-06	4.34e-06	5.58e-06	7.61e-06	6.25e-06	5.37e-06	6.39e-06	4.15e-06	5.49e-06	6.53e-06	4.35e-06	4.74e-06	6.07e-06	4e-06	4.06e-06	7.88e-06	3.94e-06	2e-05	1.279e-05	9.449e-05	1.169e-05	7.13e-06	5.32e-06	5.19e-06	4.77e-06	6.11e-06	4.45e-06
432D	2.5	PND90	4.68e-06	5.34e-06	4.76e-06	5.74e-06	3.04e-06	4.29e-06	6.91e-06	6.72e-06	7.23e-06	5.06e-06	7.22e-06	5.52e-06	9.27e-06	7.03e-06	9.85e-06	6.75e-06	9.67e-06	5.51e-06	6.99e-06	4.03e-06	3.56e-06	4.66e-06	5.8e-06	7.98e-06	6.41e-06	3.21e-06	6.42e-06	5.55e-06	3.82e-06	7.49e-06	5.98e-06	8.12e-06	4.28e-06	5.35e-06	7.95e-06	5.55e-06	4.95e-06	3.762e-05	2.079e-05	0.00014763	2.727e-05	3.14e-06	5.3e-06	5.63e-06	5.03e-06	4.6e-06	6.99e-06
1021	2.5	PND90	9.22e-06	7.07e-06	9.08e-06	5.46e-06	9.17e-06	6.09e-06	5.21e-06	3.82e-06	6.95e-06	5.5e-06	5.02e-06	4.66e-06	4.74e-06	5.26e-06	8.97e-06	6.27e-06	7.48e-06	7.31e-06	8.3e-06	8e-06	6.43e-06	4.66e-06	3.75e-06	6.81e-06	9.05e-06	9.44e-06	5.43e-06	5.48e-06	9.02e-06	7.07e-06	5.06e-06	3.36e-06	6.08e-06	6.57e-06	5.11e-06	9.06e-06	6.89e-06	1.137e-05	1.039e-05	6.508e-05	1.57e-05	1.09e-05	8.21e-06	9.96e-06	5.61e-06	7.79e-06	6.77e-06
732	2.5	PND140	6.76e-06	3.7e-06	4.44e-06	4.37e-06	4.86e-06	4.85e-06	6.04e-06	5.07e-06	7.69e-06	4.88e-06	4.59e-06	5.8e-06	6e-06	4.38e-06	7.46e-06	6.7e-06	5.61e-06	7.52e-06	7.18e-06	4.41e-06	5.05e-06	7.14e-06	5.7e-06	3.27e-06	4e-06	5.26e-06	4.62e-06	5.2e-06	5.45e-06	3.21e-06	3.91e-06	4.05e-06	4.35e-06	6.07e-06	6.31e-06	3.92e-06	5.89e-06	1.569e-05	7.53e-06	5.766e-05	3.339e-05	6.69e-06	4.63e-06	3.44e-06	5.26e-06	6.7e-06	2.42e-06
978	2.5	PND140	5.13e-06	5.65e-06	3.64e-06	5.78e-06	6.73e-06	3.64e-06	4.6e-06	4.26e-06	4.78e-06	3.74e-06	3.7e-06	5.72e-06	4.17e-06	1.62e-06	4.18e-06	4.69e-06	5.61e-06	4.45e-06	5.45e-06	2.56e-06	2.82e-06	4.92e-06	5.39e-06	5.69e-06	3.51e-06	4.66e-06	4.59e-06	2.7e-06	4.7e-06	3.29e-06	5.21e-06	3.55e-06	3.11e-06	3.86e-06	4.27e-06	4.52e-06	5.51e-06	1.208e-05	4e-06	6.264e-05	4.165e-05	5.16e-06	6.12e-06	6.23e-06	6.34e-06	5.31e-06	3.84e-06
656	2.5	PND140	5.43e-06	4.92e-06	4.58e-06	3.22e-06	4.21e-06	3.71e-06	4.45e-06	7.01e-06	5.52e-06	3.17e-06	7.38e-06	4.48e-06	6.3e-06	7.05e-06	4.89e-06	4.69e-06	4.71e-06	5.82e-06	4.45e-06	4.8e-06	3.32e-06	3.71e-06	3.94e-06	7.2e-06	2.34e-06	3.06e-06	3.62e-06	5.92e-06	7.75e-06	7.22e-06	5.85e-06	5.21e-06	3.68e-06	5.19e-06	4.12e-06	2.56e-06	7.01e-06	8.88e-06	4.59e-06	7.123e-05	3.208e-05	3.93e-06	4.47e-06	4.69e-06	6.11e-06	6.5e-06	4.49e-06
949	2.5	PND140	3.08e-06	4.32e-06	4.4e-06	4.38e-06	5.15e-06	4.88e-06	5.17e-06	7.54e-06	3.64e-06	4.28e-06	3.91e-06	4.04e-06	3.54e-06	4.58e-06	6.63e-06	3.6e-06	4.81e-06	5.54e-06	5.47e-06	5.96e-06	4.39e-06	6.08e-06	7.62e-06	6.63e-06	7.73e-06	4.63e-06	4.49e-06	5.23e-06	6.01e-06	5.68e-06	7.45e-06	3.69e-06	5.28e-06	3.1e-06	3.76e-06	9.17e-06	3.81e-06	6.38e-06	3.13e-06	6.03e-05	1.923e-05	4.96e-06	2.4e-06	7.17e-06	5.39e-06	4.29e-06	4.75e-06
1049	2.5	PND140	9.25e-06	6.51e-06	3.99e-06	5.23e-06	3.37e-06	8.41e-06	7.03e-06	3.44e-06	6.16e-06	5.49e-06	5.85e-06	3.45e-06	4.94e-06	3.61e-06	5.93e-06	8.32e-06	3.31e-06	4.84e-06	6.5e-06	8.11e-06	6.25e-06	3.75e-06	7.16e-06	7.26e-06	5.58e-06	4.36e-06	4.52e-06	8.17e-06	3.89e-06	4.62e-06	4.14e-06	4.64e-06	6.05e-06	3.36e-06	6.38e-06	5.16e-06	4.69e-06	7.76e-06	7.36e-06	5.974e-05	1.111e-05	5.46e-06	5.57e-06	3.68e-06	5.5e-06	5.46e-06	6.71e-06
432E	2.5	PND140	5.11e-06	6.8e-06	4.83e-06	5.03e-06	3.46e-06	6.01e-06	6.9e-06	6.69e-06	4.94e-06	4.18e-06	6.14e-06	3.51e-06	4.03e-06	3.35e-06	7.03e-06	7.75e-06	6.04e-06	6.03e-06	5.4e-06	4.08e-06	6.04e-06	4.63e-06	5.28e-06	5.55e-06	6.33e-06	2.46e-06	4.96e-06	6.38e-06	3.33e-06	6.1e-06	7.89e-06	4.51e-06	4.98e-06	5.92e-06	7.45e-06	3.48e-06	5.06e-06	1.392e-05	9.06e-06	9.282e-05	1.847e-05	4.9e-06	4.6e-06	4.88e-06	5.52e-06	6.84e-06	5.79e-06
951	2.5	PND140	8.21e-06	9.34e-06	6.16e-06	6.09e-06	5.55e-06	5.13e-06	5.56e-06	5.88e-06	7.8e-06	4.71e-06	8.1e-06	6.59e-06	6.5e-06	1.047e-05	7.64e-06	8.09e-06	8.45e-06	4.36e-06	5.01e-06	5.27e-06	8.36e-06	4.94e-06	6.28e-06	7.95e-06	7.08e-06	9.62e-06	7.5e-06	5.01e-06	7.39e-06	4.65e-06	4.1e-06	5.64e-06	7e-06	4.75e-06	7.91e-06	4.63e-06	7.1e-06	1.582e-05	7.64e-06	0.00011288	1.887e-05	7.53e-06	5.04e-06	7.17e-06	8.33e-06	6.94e-06	5.2e-06
942	2.5	PND200	4.54e-06	4.39e-06	4.5e-06	3.8e-06	6.5e-06	1.7e-06	4.81e-06	5.19e-06	6.66e-06	4.67e-06	5.48e-06	4.42e-06	6.73e-06	6.99e-06	7.03e-06	6.87e-06	5.7e-06	3.11e-06	3.71e-06	6.38e-06	6.59e-06	6.47e-06	6.61e-06	8.03e-06	4.27e-06	9.32e-06	6.69e-06	7.94e-06	5.43e-06	5.98e-06	7.5e-06	5.2e-06	9.1e-06	6.53e-06	6.91e-06	7.02e-06	4.66e-06	3.304e-05	1.229e-05	4.305e-05	1.934e-05	3.83e-06	4.94e-06	6.71e-06	9.48e-06	8.72e-06	8.41e-06
655	2.5	PND200	3.6e-06	7.96e-06	5.86e-06	5.96e-06	3.59e-06	5.67e-06	8.82e-06	6.82e-06	5.93e-06	9.09e-06	4.42e-06	5e-06	5.24e-06	6.27e-06	8.5e-06	2.86e-06	2.32e-06	3.17e-06	5.5e-06	4.07e-06	5.78e-06	6.04e-06	4.78e-06	5.81e-06	4.92e-06	4.54e-06	6.53e-06	6.98e-06	3.51e-06	6.61e-06	7.7e-06	5.87e-06	3.46e-06	3.16e-06	1.36e-06	4.97e-06	8.52e-06	2.558e-05	8.02e-06	5.032e-05	7.343e-05	5.74e-06	4.23e-06	6.82e-06	6e-06	3.62e-06	6.55e-06
432F	2.5	PND200	4.84e-06	4.59e-06	8.5e-06	4.33e-06	5.47e-06	7.64e-06	7.39e-06	4.42e-06	5.85e-06	9.58e-06	6.73e-06	9.9e-06	5.36e-06	5.66e-06	2.33e-06	5.94e-06	4.39e-06	1.041e-05	8.56e-06	5.88e-06	5.27e-06	6.91e-06	6.01e-06	7.22e-06	9e-06	9.27e-06	5.97e-06	6.96e-06	9.6e-06	8.91e-06	5.17e-06	6.3e-06	8.1e-06	6.24e-06	5.72e-06	4.75e-06	5.09e-06	9.32e-06	5.33e-06	6.397e-05	1.858e-05	5.37e-06	4.11e-06	4.31e-06	6.51e-06	1.083e-05	7.28e-06
647	2.5	PND200	5.55e-06	5.71e-06	7.81e-06	7.86e-06	6.36e-06	1.021e-05	7.18e-06	5.76e-06	5.71e-06	3.41e-06	5.83e-06	8.34e-06	5.81e-06	6.05e-06	7.5e-06	8.74e-06	6.13e-06	4.45e-06	8.33e-06	4.82e-06	3.62e-06	5.29e-06	6.41e-06	7.02e-06	5.35e-06	1.001e-05	8.18e-06	2.75e-06	5.48e-06	7.24e-06	4.75e-06	6.94e-06	4.88e-06	5.4e-06	7.33e-06	6.8e-06	6.03e-06	5.72e-06	5.02e-06	5.477e-05	1.166e-05	7.56e-06	8.22e-06	7.26e-06	5.11e-06	5.79e-06	3.81e-06
977	2.5	PND200	5.46e-06	3.82e-06	6.29e-06	5.05e-06	4.14e-06	5.21e-06	4.93e-06	6.94e-06	3.07e-06	2.97e-06	6.64e-06	4.35e-06	5.1e-06	3.07e-06	4.94e-06	3.68e-06	6.6e-06	5.98e-06	7.18e-06	4.15e-06	3.88e-06	6.04e-06	4.11e-06	9.07e-06	6.14e-06	7.85e-06	4.54e-06	4.55e-06	3.92e-06	1.078e-05	5.07e-06	5.63e-06	5.79e-06	6.44e-06	6.46e-06	4.24e-06	3.51e-06	9.08e-06	2.6e-06	3.289e-05	3.851e-05	5.19e-06	5.04e-06	7.46e-06	5.35e-06	4.55e-06	4.9e-06
1019	2.5	PND200	6.87e-06	7.43e-06	7.71e-06	8.11e-06	6.92e-06	5.33e-06	5.61e-06	6.24e-06	7.5e-06	9.8e-06	7.91e-06	5.56e-06	7.66e-06	7.47e-06	7.15e-06	5.43e-06	4.98e-06	5.17e-06	7.86e-06	7.4e-06	1.166e-05	6.56e-06	5.5e-06	3.96e-06	6.52e-06	1.246e-05	7.32e-06	7.38e-06	6.02e-06	4.1e-06	5.38e-06	5.92e-06	3.39e-06	3.44e-06	6.5e-06	9.42e-06	4.23e-06	8.14e-06	5.53e-06	6.106e-05	2e-05	7.09e-06	5.19e-06	5.01e-06	5.45e-06	7.42e-06	5.48e-06
689	2.5	PND200	5.87e-06	7.59e-06	7.7e-06	5.49e-06	3.51e-06	9.42e-06	5.36e-06	8.81e-06	9e-06	6.98e-06	6.83e-06	2.16e-06	8.6e-06	3.9e-06	6.23e-06	6.39e-06	5.87e-06	4.32e-06	1.058e-05	7.51e-06	8.26e-06	8.31e-06	9.82e-06	5.63e-06	5.07e-06	5.29e-06	4.81e-06	9.67e-06	9.46e-06	7.04e-06	7.24e-06	6.12e-06	9.09e-06	6.11e-06	7.65e-06	4.18e-06	7.13e-06	2.391e-05	3.034e-05	7.488e-05	6.23e-06	6.85e-06	8.13e-06	9.33e-06	1.084e-05	1.196e-05	5.89e-06
731	2.5	PND200	6.52e-06	4.65e-06	7.76e-06	6.71e-06	5.25e-06	7.31e-06	5.32e-06	8.14e-06	7.8e-06	7.54e-06	6.2e-06	5.49e-06	6.15e-06	5.38e-06	6.27e-06	4.99e-06	7.32e-06	3.69e-06	1.017e-05	5.36e-06	7.44e-06	5.84e-06	6.97e-06	3.05e-06	7.58e-06	6.06e-06	5.94e-06	4.01e-06	4.04e-06	4.26e-06	6.04e-06	6.05e-06	6.59e-06	6.3e-06	6.25e-06	5.54e-06	5.28e-06	1.186e-05	2.583e-05	7.359e-05	8.6e-06	2.4e-06	5.12e-06	7.95e-06	3.51e-06	6.2e-06	5.49e-06
945	2.5	PND200	3.24e-06	4.5e-06	4.52e-06	2.92e-06	5.38e-06	3.32e-06	2.97e-06	3.91e-06	3.78e-06	3.78e-06	2.57e-06	3.43e-06	3.88e-06	4.63e-06	5.07e-06	3.78e-06	3.79e-06	4.24e-06	2.89e-06	2.66e-06	1.73e-06	2.7e-06	3.69e-06	3.05e-06	2.08e-06	3.49e-06	3.45e-06	6.85e-06	4.83e-06	2.15e-06	3.24e-06	2.33e-06	4.09e-06	6.95e-06	4.4e-06	5.43e-06	1.88e-06	5.284e-05	1.322e-05	2.898e-05	2.84e-06	4.05e-06	5.5e-06	4.2e-06	4.11e-06	4.81e-06	6.49e-06
1068A	25	PND21	9.36e-06	7.28e-06	7.41e-06	1.138e-05	8.17e-06	5.26e-06	6.8e-06	7.06e-06	6.93e-06	5.28e-06	6.16e-06	3.56e-06	8e-06	6.67e-06	6.44e-06	6.25e-06	6.81e-06	9.67e-06	7.86e-06	9.51e-06	5.06e-06	7.86e-06	6.69e-06	8.37e-06	7.2e-06	7.13e-06	7.32e-06	5.25e-06	5.9e-06	9e-06	3.42e-06	8.28e-06	6.25e-06	8.67e-06	1.043e-05	7.69e-06	8.9e-06	1.623e-05	2.039e-05	0.00010031	5.37e-06	7.16e-06	5.84e-06	5.97e-06	7.34e-06	7.17e-06	5.31e-06
1080A	25	PND21	6.69e-06	9.53e-06	6.59e-06	5.06e-06	5.8e-06	5.55e-06	8.03e-06	7.61e-06	5.16e-06	7.04e-06	2.51e-06	5.1e-06	5.39e-06	4.35e-06	4.92e-06	5.6e-06	5.6e-06	6.6e-06	4.42e-06	4.19e-06	3.2e-06	7.38e-06	4.82e-06	7.66e-06	8.6e-06	3.25e-06	6.3e-06	5.31e-06	4.46e-06	7.07e-06	8.02e-06	5.48e-06	4.74e-06	6.16e-06	6.32e-06	6.68e-06	2.93e-06	6.292e-05	2.946e-05	7.338e-05	2.15e-06	7.76e-06	4.65e-06	3.25e-06	5.95e-06	5.43e-06	6.57e-06
1085A	25	PND21	6.46e-06	5.05e-06	4.71e-06	5.54e-06	1.057e-05	6.49e-06	6.83e-06	4.34e-06	7.07e-06	7.48e-06	4.8e-06	8.62e-06	8.66e-06	4.69e-06	9.15e-06	4.72e-06	7.42e-06	1.024e-05	4.33e-06	6.7e-06	6.84e-06	5.3e-06	6.6e-06	6.3e-06	8.45e-06	6.18e-06	3.18e-06	6.72e-06	4.22e-06	3.62e-06	5.16e-06	5.57e-06	4.25e-06	1.093e-05	6.73e-06	4.31e-06	7.29e-06	1.841e-05	2.03e-05	9.617e-05	1.071e-05	9.77e-06	5.6e-06	3.94e-06	7.5e-06	7.73e-06	4.59e-06
1116A	25	PND21	3.93e-06	5.58e-06	3.3e-06	2.37e-06	4.85e-06	4.81e-06	6.31e-06	5.24e-06	6.71e-06	4.79e-06	3.28e-06	6.31e-06	6.74e-06	3.64e-06	4.91e-06	3.14e-06	6.85e-06	3.85e-06	4.91e-06	3.98e-06	4.36e-06	4.24e-06	5.54e-06	4.62e-06	4.73e-06	6.08e-06	4.73e-06	4.2e-06	4.79e-06	7.31e-06	5.93e-06	6.22e-06	7.65e-06	5.56e-06	7.85e-06	5.18e-06	6.28e-06	3.776e-05	1.131e-05	6.65e-05	5.57e-06	3.16e-06	6.03e-06	4.93e-06	2.81e-06	5.81e-06	6.79e-06
392A	25	PND21	6.32e-06	4.91e-06	8.01e-06	3.79e-06	2.79e-06	5.11e-06	4.99e-06	5.78e-06	3.33e-06	3.97e-06	6.85e-06	3.05e-06	3.48e-06	5.63e-06	6.33e-06	4.66e-06	5.04e-06	4.73e-06	4.49e-06	7.05e-06	2.67e-06	4.26e-06	5.51e-06	5.57e-06	8.05e-06	7.73e-06	3.1e-06	6.23e-06	4.14e-06	6.57e-06	6.29e-06	5.43e-06	5.4e-06	7.41e-06	6.03e-06	6.05e-06	3.78e-06	4.819e-05	1.783e-05	6.354e-05	4e-06	3.68e-06	4.87e-06	5.89e-06	5.48e-06	4.99e-06	5.21e-06
448A	25	PND21	3.58e-06	6.19e-06	3e-06	5.35e-06	3.64e-06	4.07e-06	5.05e-06	5.57e-06	3.58e-06	2.91e-06	3.81e-06	2.03e-06	4.12e-06	5.8e-06	6.99e-06	3.93e-06	2.79e-06	2.34e-06	4.19e-06	2.45e-06	4.49e-06	3.68e-06	3.24e-06	4.1e-06	6.1e-06	3.56e-06	5.47e-06	3.89e-06	3.07e-06	3.06e-06	3.47e-06	4.5e-06	4.13e-06	4.01e-06	3.88e-06	8.22e-06	4.73e-06	7.995e-05	2.106e-05	4.498e-05	1.056e-05	4.76e-06	5.65e-06	2.85e-06	5.83e-06	3.23e-06	3.95e-06
1083A	25	PND21	4.3e-06	4.88e-06	6.56e-06	3.96e-06	2.87e-06	5.56e-06	4.16e-06	5.22e-06	3.41e-06	4.6e-06	5.97e-06	4.29e-06	4.12e-06	3.65e-06	4.81e-06	3.87e-06	4.18e-06	7.1e-06	4.32e-06	6.25e-06	4.37e-06	4.75e-06	5.9e-06	4.16e-06	5.37e-06	4.65e-06	6.13e-06	4.36e-06	5.88e-06	3.33e-06	2.91e-06	4.25e-06	4.6e-06	4.84e-06	3.49e-06	3.32e-06	2.44e-06	2.13e-05	9.32e-06	0.00010206	1.582e-05	4.26e-06	5.86e-06	2.53e-06	4.28e-06	7.9e-06	4.28e-06
1092A	25	PND21	2.91e-06	6.61e-06	4.51e-06	6.08e-06	6.66e-06	5.74e-06	4.49e-06	6.82e-06	3.81e-06	5.44e-06	3.76e-06	3.73e-06	6.99e-06	4.31e-06	4.42e-06	6.41e-06	6.2e-06	6.44e-06	4.64e-06	4.26e-06	6.5e-06	5.55e-06	3.47e-06	4.08e-06	4.58e-06	4.24e-06	5.83e-06	5.69e-06	7.03e-06	7.76e-06	5.97e-06	3.85e-06	6.13e-06	4.87e-06	5.09e-06	4.21e-06	3.81e-06	3.683e-05	1.339e-05	9.611e-05	1.262e-05	5.03e-06	5.99e-06	8.15e-06	5.79e-06	5.22e-06	6.17e-06
219A	25	PND21	6.17e-06	6.96e-06	3.87e-06	5.82e-06	7.17e-06	4.36e-06	9.14e-06	9.13e-06	6.9e-06	4.56e-06	5.6e-06	8.44e-06	6.92e-06	8.3e-06	3.09e-06	5.33e-06	5.31e-06	5.02e-06	7.16e-06	4.81e-06	7.5e-06	3.5e-06	7.32e-06	4.91e-06	5.23e-06	9.06e-06	7.36e-06	8.57e-06	3.23e-06	8.42e-06	5.39e-06	5.85e-06	6.54e-06	4.53e-06	4.01e-06	6.82e-06	6.1e-06	8.22e-06	1.22e-05	7.892e-05	7.56e-06	3.7e-06	6.26e-06	3.46e-06	7.3e-06	6.8e-06	5.87e-06
479A	25	PND21	4.04e-06	7.12e-06	5.55e-06	2.98e-06	6.82e-06	7.3e-06	4.8e-06	5.98e-06	4.66e-06	7.7e-06	4.98e-06	4.11e-06	7.37e-06	6.94e-06	6.78e-06	9.58e-06	5.97e-06	6.76e-06	8.88e-06	5.62e-06	5.74e-06	6.57e-06	5.62e-06	7.71e-06	4.79e-06	7.72e-06	8.05e-06	7.26e-06	4.15e-06	5.67e-06	7.83e-06	4.34e-06	5.55e-06	3.09e-06	8.22e-06	5.27e-06	7.72e-06	4.562e-05	2.574e-05	9.238e-05	5.91e-06	5.84e-06	5.43e-06	5.32e-06	7.98e-06	5.59e-06	5.16e-06
1085B	25	PND50	6.17e-06	9.97e-06	9.56e-06	7.25e-06	7.04e-06	9.25e-06	6.46e-06	7.69e-06	5.71e-06	7.23e-06	6.16e-06	6.32e-06	8.51e-06	8.25e-06	6.89e-06	6.82e-06	7.86e-06	9.18e-06	1.081e-05	9.91e-06	9.67e-06	6.32e-06	7.83e-06	1.006e-05	1.075e-05	4.21e-06	5.68e-06	8.86e-06	7.58e-06	9.61e-06	6.28e-06	7.81e-06	6.82e-06	9.91e-06	6.07e-06	5.88e-06	5.87e-06	4.254e-05	2.273e-05	7.838e-05	6.56e-06	5.42e-06	6.13e-06	8.93e-06	8.49e-06	1.023e-05	5.87e-06
565B	25	PND50	4.25e-06	7.17e-06	7.31e-06	7.13e-06	5.15e-06	6.84e-06	9.98e-06	7.92e-06	4.75e-06	5.41e-06	4.56e-06	3.83e-06	5.36e-06	6.23e-06	4.81e-06	7.83e-06	3.6e-06	6.01e-06	5.37e-06	4.45e-06	5.49e-06	8.08e-06	5.47e-06	6.5e-06	6.89e-06	5.68e-06	7.26e-06	4.9e-06	3.83e-06	9.54e-06	5.39e-06	8.44e-06	5.88e-06	9.31e-06	7.15e-06	7.31e-06	5.84e-06	1.889e-05	9.69e-06	7.673e-05	8.14e-06	8.2e-06	8.21e-06	1.039e-05	8.14e-06	5.49e-06	6.16e-06
1068B	25	PND50	4.48e-06	4.14e-06	6.48e-06	4.01e-06	3.78e-06	8.4e-06	5.12e-06	6.89e-06	4.46e-06	6.44e-06	4.89e-06	5.94e-06	8.39e-06	5.41e-06	4.12e-06	5.45e-06	5.78e-06	8.09e-06	3.19e-06	6.87e-06	4.84e-06	7.46e-06	4.09e-06	5.67e-06	3.25e-06	5.79e-06	3.94e-06	3.98e-06	3.14e-06	7.5e-06	7.15e-06	6.68e-06	7.08e-06	7.35e-06	5.85e-06	8.53e-06	4.67e-06	5.151e-05	1.619e-05	8.113e-05	2.797e-05	5.66e-06	7.44e-06	6.32e-06	6.67e-06	7.22e-06	6.52e-06
1116B	25	PND50	9.29e-06	9.68e-06	7.2e-06	5.92e-06	6.44e-06	5.1e-06	7.53e-06	9.75e-06	8.56e-06	6.38e-06	7.73e-06	8.16e-06	9.07e-06	7.41e-06	1.117e-05	7.54e-06	8.36e-06	9.97e-06	8.4e-06	1.299e-05	6.28e-06	8.49e-06	8.06e-06	4.87e-06	7.29e-06	4.48e-06	5.25e-06	6.46e-06	1.35e-05	6.47e-06	6.66e-06	5.84e-06	1.096e-05	6.59e-06	5.25e-06	9.75e-06	7.46e-06	3.656e-05	1.216e-05	7.665e-05	6.88e-06	3.47e-06	7.09e-06	9.25e-06	7.42e-06	9.74e-06	1.123e-05
298B	25	PND50	5.29569e-06	5.1965e-06	4.04805e-06	4.9836e-06	4.20253e-06	6.39769e-06	6.16131e-06	2.63941e-06	7.21565e-06	7.41437e-06	6.52815e-06	5.74056e-06	5.12115e-06	8.29623e-06	2.43369e-06	6.37462e-06	5.65261e-06	7.64225e-06	7.81884e-06	5.74122e-06	6.51957e-06	5.32811e-06	3.42082e-06	3.56754e-06	7.162e-06	4.31848e-06	5.50958e-06	7.15482e-06	5.76222e-06	4.30702e-06	1.60042e-06	6.77272e-06	1.21986e-06	5.25327e-06	7.95227e-06	6.37727e-06	4.43105e-06	1.38898e-05	1.55249e-05	2.73086e-05	2.8901e-05	8.33908e-06	5.17705e-06	3.59083e-06	4.92556e-06	5.16277e-06	6.30798e-06
448B	25	PND50	4.06828e-06	4.69125e-06	6.72481e-06	5.30012e-06	9.09515e-06	6.09685e-06	5.87852e-06	5.30521e-06	5.08086e-06	7.78265e-06	6.57805e-06	6.21379e-06	4.944e-06	6.19381e-06	5.36619e-06	6.21574e-06	5.52182e-06	6.59569e-06	4.60711e-06	5.17357e-06	6.91384e-06	5.72176e-06	7.42911e-06	1.06064e-05	9.7417e-06	4.54397e-06	1.0022e-05	4.78312e-06	7.60482e-06	9.18497e-06	7.89393e-06	4.8747e-06	5.49782e-06	4.35964e-06	8.65497e-06	5.59523e-06	6.34336e-06	1.14753e-05	1.0283e-05	4.63858e-05	3.56909e-05	6.007e-06	3.62095e-06	6.47291e-06	7.17131e-06	4.87891e-06	7.30295e-06
501B	25	PND50	5.9505e-06	6.82259e-06	4.64133e-06	5.00242e-06	7.80583e-06	5.98035e-06	4.81972e-06	7.26069e-06	6.80342e-06	6.97003e-06	5.23193e-06	4.00127e-06	6.07544e-06	7.06874e-06	4.62779e-06	5.22782e-06	6.49781e-06	4.63437e-06	7.15912e-06	7.39792e-06	5.42604e-06	1.03611e-05	4.67904e-06	6.60473e-06	5.27567e-06	5.17031e-06	6.66412e-06	2.06533e-06	5.52621e-06	6.57396e-06	3.56588e-06	5.74286e-06	5.09386e-06	4.14575e-06	5.8159e-06	5.20763e-06	5.13494e-06	2.52688e-05	9.42484e-06	8.0809e-05	2.40161e-05	4.64691e-06	7.02275e-06	9.08458e-06	6.26993e-06	5.25046e-06	8.4935e-06
219B	25	PND50	9.23e-06	7.84e-06	9.63e-06	1.087e-05	1.239e-05	9.73e-06	9.39e-06	6.49e-06	4.67e-06	1.115e-05	7.7e-06	9.21e-06	8.03e-06	8.22e-06	8e-06	9.92e-06	8.38e-06	8.48e-06	5.45e-06	5.66e-06	6.18e-06	5.92e-06	7.41e-06	4.11e-06	7.6e-06	8.14e-06	1.15e-05	5.64e-06	9.82e-06	8.28e-06	1.254e-05	1.089e-05	1.117e-05	8.84e-06	7.81e-06	1.265e-05	9.35e-06	1.676e-05	1.7e-05	9.273e-05	8.8e-06	4.44e-06	8.12e-06	6.89e-06	6.23e-06	6.76e-06	5.63e-06
479B	25	PND50	6.85e-06	3.39e-06	4.47e-06	8.37e-06	7.12e-06	6.13e-06	7.7e-06	4.65e-06	8.07e-06	5.16e-06	7.24e-06	4.87e-06	8.89e-06	6.02e-06	5.28e-06	7.07e-06	5.52e-06	3.03e-06	6.73e-06	7.22e-06	4.85e-06	7.52e-06	6.63e-06	4.57e-06	4.71e-06	2.29e-06	3.87e-06	7.22e-06	3.68e-06	6.65e-06	5.21e-06	3.21e-06	3.18e-06	3.45e-06	4.8e-06	4.76e-06	7.03e-06	5.077e-05	1.3e-05	0.00011621	1.419e-05	3.63e-06	4.4e-06	6.33e-06	4.67e-06	7.1e-06	5.97e-06
818	25	PND90	5.11e-06	5.08e-06	5.76e-06	7.06e-06	4.7e-06	4.01e-06	6.55e-06	6.28e-06	3.03e-06	3.4e-06	5.33e-06	4.01e-06	4.89e-06	7.95e-06	4.77e-06	3.27e-06	7.94e-06	5.14e-06	4.2e-06	8.19e-06	4.44e-06	4.84e-06	5.04e-06	5.74e-06	3.89e-06	5.36e-06	8.24e-06	5.49e-06	4.34e-06	3.72e-06	2.96e-06	3.75e-06	2.85e-06	5.24e-06	1.76e-06	6.08e-06	5.68e-06	6.91e-06	6.15e-06	5.066e-05	1.221e-05	3.58e-06	9.01e-06	5.18e-06	5.37e-06	4.29e-06	4.57e-06
1059	25	PND90	5.84e-06	5.22e-06	7.89e-06	6.35e-06	9.54e-06	2.33e-06	4.12e-06	4.71e-06	6.06e-06	7.99e-06	6.27e-06	4.61e-06	4.39e-06	5.86e-06	5.9e-06	6.24e-06	5.2e-06	3.34e-06	4e-06	5.91e-06	6.63e-06	7.01e-06	6.38e-06	7.78e-06	5.12e-06	7.11e-06	4.69e-06	6.3e-06	5.05e-06	9.92e-06	6.9e-06	6.1e-06	6.5e-06	8.1e-06	5.83e-06	4.03e-06	6.41e-06	3.354e-05	1.235e-05	0.00013534	2.162e-05	4.36e-06	6.07e-06	6.64e-06	6.06e-06	7.4e-06	6.81e-06
784	25	PND90	5.25e-06	8.43e-06	5.44e-06	8.52e-06	5.09e-06	2.5e-06	6.74e-06	6.7e-06	6.71e-06	6.55e-06	8.83e-06	5.47e-06	6.13e-06	4.45e-06	7.2e-06	3.27e-06	9.06e-06	5.67e-06	4.13e-06	6.08e-06	7.05e-06	7.04e-06	6.38e-06	2.82e-06	4.98e-06	6.35e-06	8.1e-06	6.36e-06	8.83e-06	4.83e-06	4.24e-06	3.8e-06	8.66e-06	9.55e-06	7.44e-06	7.44e-06	6.53e-06	4.427e-05	1.421e-05	9.973e-05	8.46e-06	8.52e-06	9.57e-06	8.42e-06	5.82e-06	5.36e-06	2.83e-06
868	25	PND90	4.61e-06	6.94e-06	6.04e-06	5.05e-06	7.39e-06	5.3e-06	5.19e-06	6.7e-06	7.95e-06	6.14e-06	6.13e-06	5.15e-06	6.21e-06	8.55e-06	6.61e-06	6.82e-06	5.51e-06	4.87e-06	4.85e-06	6.14e-06	7.28e-06	5.73e-06	5.01e-06	4.1e-06	6.1e-06	6.35e-06	4.31e-06	7.2e-06	5.6e-06	1.015e-05	4.72e-06	3.97e-06	3.59e-06	4.69e-06	4.1e-06	3.88e-06	6.45e-06	5.344e-05	1.853e-05	9.642e-05	1.082e-05	5.74e-06	4.38e-06	3.85e-06	7.05e-06	6.15e-06	3.87e-06
1305	25	PND90	5.59e-06	5.4e-06	8.66e-06	1.021e-05	3.84e-06	5.39e-06	7.22e-06	6.33e-06	7.72e-06	8.17e-06	4.11e-06	6.56e-06	8.46e-06	4.65e-06	5.9e-06	5.86e-06	8.08e-06	8.02e-06	6.53e-06	4.78e-06	8.02e-06	8.52e-06	7.14e-06	5.49e-06	4.92e-06	4.26e-06	9.85e-06	1.094e-05	7.62e-06	5.71e-06	6.66e-06	4.89e-06	7.78e-06	7.54e-06	8.36e-06	6.14e-06	9.55e-06	7.55e-06	1.615e-05	0.00010006	9.15e-06	8.78e-06	6.97e-06	8.6e-06	5.28e-06	4.55e-06	1.186e-05
1311	25	PND90	7.57e-06	7.96e-06	1.07e-05	7.85e-06	7.62e-06	5.23e-06	5.17e-06	7.31e-06	8.61e-06	7.84e-06	8.97e-06	6.47e-06	5.1e-06	3.51e-06	5.53e-06	5.26e-06	5.16e-06	7.84e-06	8.05e-06	7.28e-06	4.91e-06	4.74e-06	6.75e-06	5.21e-06	5.94e-06	6.77e-06	7.7e-06	7.15e-06	7.37e-06	5.95e-06	7.78e-06	5.86e-06	5.41e-06	6.35e-06	9.13e-06	5.73e-06	6.07e-06	2.333e-05	1.406e-05	8.921e-05	5.7e-06	5.86e-06	4.58e-06	8.91e-06	8.44e-06	6.18e-06	7.55e-06
605	25	PND90	5.71e-06	1.011e-05	8.11e-06	6.62e-06	5.08e-06	7.02e-06	8.47e-06	2.98e-06	7.96e-06	5.55e-06	5.41e-06	4.49e-06	5.04e-06	6.86e-06	6.4e-06	6.69e-06	3.64e-06	2.3e-06	9.6e-06	8.29e-06	6.57e-06	7.03e-06	5.88e-06	8.1e-06	7.22e-06	5.43e-06	7.73e-06	6.56e-06	7.16e-06	7.02e-06	1.475e-05	6.1e-06	7.33e-06	6.92e-06	8.81e-06	3.44e-06	4.81e-06	4.505e-05	1.129e-05	6.397e-05	1.843e-05	8.8e-06	3.94e-06	7.76e-06	4.68e-06	8.84e-06	9.15e-06
629	25	PND90	7.81243e-06	5.55417e-06	5.36091e-06	6.96335e-06	5.85961e-06	4.71552e-06	7.52991e-06	6.404e-06	5.50291e-06	5.21642e-06	6.14589e-06	4.70528e-06	3.86467e-06	1.58707e-06	5.98213e-06	5.24617e-06	6.09778e-06	6.4082e-06	4.76219e-06	4.03397e-06	1.10743e-05	4.1839e-06	6.77174e-06	5.89164e-06	9.65049e-06	2.8912e-06	5.06182e-06	7.44213e-06	4.71797e-06	5.94265e-06	4.04727e-06	4.84534e-06	2.93469e-06	1.08174e-06	6.89241e-06	4.23251e-06	4.87124e-06	8.60908e-06	7.27642e-06	6.80607e-05	2.0422e-05	7.91668e-06	4.63742e-06	3.60463e-06	3.72656e-06	5.31563e-06	4.30702e-06
997	25	PND90	1.03186e-06	7.05508e-06	4.38443e-06	5.89821e-06	4.74093e-06	6.29281e-06	5.20804e-06	5.43282e-06	7.30432e-06	4.39689e-06	2.5093e-06	5.27132e-06	5.13191e-06	9.11266e-06	5.80228e-06	6.44382e-06	7.33007e-06	5.56319e-06	7.24385e-06	5.71245e-06	4.12444e-06	7.11717e-06	5.64236e-06	5.47719e-06	5.90034e-06	2.56078e-06	4.10154e-06	5.16637e-06	4.85347e-06	4.64096e-06	6.94141e-06	4.47294e-06	5.77047e-06	4.82187e-06	7.0813e-06	4.67014e-06	4.85905e-06	1.59731e-05	6.87414e-06	7.0486e-05	4.24894e-05	4.68367e-06	5.41249e-06	5.93665e-06	6.75182e-06	5.64746e-06	6.40212e-06
671	25	PND90	5.14354e-06	5.95603e-06	4.15705e-06	4.34089e-06	5.02919e-06	7.23631e-06	5.73809e-06	1.51465e-06	6.04772e-06	3.47047e-06	9.31261e-06	7.17863e-06	4.02681e-06	6.4648e-06	2.63587e-06	5.60882e-06	4.65003e-06	6.21809e-06	6.21475e-06	3.95801e-06	9.41378e-06	5.70671e-06	5.72161e-06	6.00847e-06	4.39333e-06	8.02494e-06	4.90142e-06	5.61711e-06	7.23496e-06	4.52538e-06	8.89395e-06	5.61881e-06	5.25845e-06	6.904e-06	5.51437e-06	4.08158e-06	4.67689e-06	9.27649e-06	3.46395e-06	7.669e-05	3.4198e-05	6.7533e-06	3.75253e-06	7.17897e-06	5.275e-06	6.12926e-06	3.40527e-06
966	25	PND140	8.38e-06	7.29e-06	7.11e-06	7.16e-06	9.34e-06	8.42e-06	6.05e-06	4.47e-06	6.88e-06	5.75e-06	5.32e-06	6.92e-06	7.08e-06	5.98e-06	7.1e-06	5.35e-06	5.5e-06	9.99e-06	6e-06	5.67e-06	7.6e-06	4.14e-06	6e-06	5.97e-06	4.6e-06	4.28e-06	6.23e-06	3.85e-06	5.18e-06	7.77e-06	7.24e-06	9.17e-06	8.43e-06	6.34e-06	4.75e-06	7.38e-06	4.69e-06	2.23e-05	1.053e-05	7.903e-05	1.184e-05	7.68e-06	6.52e-06	6.09e-06	5.64e-06	3.39e-06	8.15e-06
603	25	PND140	7.24e-06	7.01e-06	5.93e-06	5.19e-06	2.87e-06	6.51e-06	5.21e-06	5.37e-06	5.67e-06	3.4e-06	3.75e-06	3.63e-06	2.29e-06	4.08e-06	8.02e-06	5.79e-06	7.27e-06	5.32e-06	6.83e-06	6.36e-06	9.29e-06	5.68e-06	4.89e-06	6.11e-06	3.57e-06	4.45e-06	5.42e-06	8.63e-06	6.78e-06	2.85e-06	3.12e-06	5.24e-06	4.75e-06	4.6e-06	5.54e-06	5.48e-06	6.7e-06	8.9e-06	8.67e-06	8.063e-05	5.87e-06	5.43e-06	5.58e-06	8.83e-06	7.43e-06	5.72e-06	8.08e-06
628	25	PND140	6.76e-06	5.09e-06	6.95e-06	3.53e-06	3.91e-06	5.05e-06	3.39e-06	4.35e-06	5.92e-06	3.14e-06	3.92e-06	6.46e-06	4.07e-06	5.77e-06	3.87e-06	5.56e-06	6.88e-06	5.42e-06	5.12e-06	3.09e-06	6.82e-06	5.65e-06	5.1e-06	4.11e-06	6.25e-06	4.82e-06	7e-06	4.29e-06	5.34e-06	5.39e-06	5.74e-06	4.56e-06	5.26e-06	6.24e-06	6.05e-06	3.86e-06	4.41e-06	7.95e-06	4.78e-06	5.702e-05	3.514e-05	5.07e-06	4.88e-06	5.76e-06	4.38e-06	3.29e-06	4.02e-06
785	25	PND140	3.38e-06	3.9e-06	5.03e-06	6.69e-06	6.55e-06	7.29e-06	2.53e-06	7.34e-06	5.85e-06	7.66e-06	5.8e-06	5.43e-06	7.39e-06	5.05e-06	5.41e-06	4.82e-06	5.2e-06	5.06e-06	6.34e-06	4.53e-06	4.4e-06	3.81e-06	7.71e-06	4.74e-06	5.43e-06	5.02e-06	7.47e-06	6.05e-06	2.8e-06	6.61e-06	6.21e-06	5.6e-06	5.04e-06	5.77e-06	4.21e-06	7.44e-06	4.18e-06	6.71e-06	5.55e-06	4.07e-05	3.524e-05	6.18e-06	6.39e-06	6.37e-06	5.48e-06	8.25e-06	5.47e-06
817	25	PND140	5.15e-06	5.82e-06	3.45e-06	4.37e-06	6.08e-06	5.42e-06	3.66e-06	4.9e-06	6.66e-06	4.05e-06	7.34e-06	4.99e-06	3.86e-06	7e-06	3.28e-06	3.97e-06	4.35e-06	6.49e-06	6.47e-06	5.29e-06	5.18e-06	4.02e-06	5.56e-06	4e-06	3.33e-06	4.35e-06	3.31e-06	4.06e-06	6.04e-06	2.71e-06	5.91e-06	3.3e-06	8.82e-06	4.24e-06	3.91e-06	6.73e-06	4.86e-06	5.22e-06	5.4e-06	7.678e-05	1.825e-05	3.81e-06	6.03e-06	4.23e-06	3.74e-06	4.8e-06	5.28e-06
996	25	PND140	3.9e-06	7.18e-06	4.99e-06	7.74e-06	3.63e-06	4.09e-06	5.6e-06	7.14e-06	3.67e-06	4.16e-06	3.79e-06	6.26e-06	5.22e-06	7.59e-06	8.92e-06	3.73e-06	6.66e-06	5.94e-06	4.99e-06	3.8e-06	4.83e-06	5.51e-06	5.07e-06	4.75e-06	4.19e-06	5.3e-06	4.96e-06	4.38e-06	5.47e-06	7.36e-06	5.77e-06	6.15e-06	5.63e-06	7.53e-06	4.45e-06	4.67e-06	5.33e-06	7.82e-06	7.08e-06	0.00010179	2.288e-05	4.5e-06	3.29e-06	3.92e-06	9.56e-06	5.32e-06	4.35e-06
1306	25	PND140	5.08e-06	4.08e-06	4.63e-06	7.93e-06	5.91e-06	4.64e-06	4.11e-06	5.85e-06	4.71e-06	6.81e-06	6.16e-06	4.76e-06	3.17e-06	4.57e-06	4.54e-06	5.44e-06	5.16e-06	4.74e-06	7.38e-06	5.92e-06	5.56e-06	4.8e-06	6.12e-06	8.74e-06	5.15e-06	4.71e-06	8.23e-06	8.1e-06	6.64e-06	3.83e-06	5.98e-06	7.32e-06	3.13e-06	6.08e-06	5.11e-06	5.73e-06	3.6e-06	1.206e-05	5.27e-06	2.412e-05	6.079e-05	4.3e-06	7.3e-06	5.85e-06	4.56e-06	3.31e-06	4.49e-06
672	25	PND140	3.51e-06	7.47e-06	3.57e-06	3.43e-06	5.16e-06	6.85e-06	4.87e-06	5.14e-06	5.68e-06	4.24e-06	4.3e-06	4.71e-06	4.22e-06	6.47e-06	5.34e-06	3.06e-06	4.19e-06	2.79e-06	7.21e-06	4.05e-06	4.79e-06	8.26e-06	3.55e-06	5.17e-06	6.35e-06	7.43e-06	3.63e-06	5.58e-06	5.01e-06	7.36e-06	3.55e-06	4.09e-06	3.15e-06	4.89e-06	4.28e-06	6.09e-06	4.31e-06	8.18e-06	5.13e-06	6.377e-05	1.702e-05	4.58e-06	7.23e-06	6.88e-06	7.71e-06	7.05e-06	2.92e-06
783	25	PND200	6.31e-06	2.99e-06	6.01e-06	3.85e-06	3.48e-06	2.78e-06	4.9e-06	3.88e-06	3.75e-06	3.3e-06	5.91e-06	5.45e-06	7.05e-06	4.19e-06	5.78e-06	5.73e-06	5.48e-06	8.03e-06	5.55e-06	4.44e-06	3.1e-06	7.64e-06	7.31e-06	3.76e-06	8.33e-06	9.35e-06	3.62e-06	4.13e-06	4.62e-06	5.52e-06	6.12e-06	2.68e-06	3.99e-06	3.97e-06	2.98e-06	6.06e-06	3.65e-06	2.367e-05	9.69e-06	6.151e-05	2.07e-05	4.87e-06	5.79e-06	3.63e-06	3.9e-06	2.91e-06	5.47e-06
627	25	PND200	1.022e-05	7.52e-06	6.11e-06	6e-06	8e-06	8.54e-06	5.67e-06	7.68e-06	9.24e-06	9.01e-06	3.39e-06	6.15e-06	6.34e-06	5.68e-06	1.096e-05	1.283e-05	6.03e-06	1.092e-05	5.45e-06	7.64e-06	1.037e-05	1.209e-05	9.31e-06	6.56e-06	7.39e-06	4.26e-06	6.49e-06	7.3e-06	1.402e-05	1.215e-05	6.7e-06	8.41e-06	5.94e-06	5.59e-06	6.87e-06	7.03e-06	7.68e-06	1.041e-05	2.326e-05	0.00012438	5.57e-06	9.52e-06	5.71e-06	7.5e-06	7.35e-06	9.43e-06	5.54e-06
602	25	PND200	5.21e-06	4.66e-06	7.3e-06	7.58e-06	2.51e-06	6.42e-06	4.4e-06	5.73e-06	9.34e-06	5.46e-06	4.54e-06	6.32e-06	6.48e-06	8.73e-06	1.393e-05	9.38e-06	7.3e-06	7.74e-06	6.37e-06	5.62e-06	7.46e-06	7.94e-06	7.04e-06	3.41e-06	8.38e-06	6.36e-06	6.85e-06	6.33e-06	7.5e-06	6.15e-06	8.49e-06	5.55e-06	4.26e-06	9.01e-06	1.133e-05	5.44e-06	8.74e-06	1.258e-05	8.59e-06	8.036e-05	1.687e-05	8.21e-06	7.04e-06	6.51e-06	5.36e-06	5.56e-06	8.18e-06
867	25	PND200	6.49e-06	4.98e-06	5.51e-06	6.02e-06	6.12e-06	4.21e-06	7.03e-06	5.01e-06	5.24e-06	6e-06	3.66e-06	7.79e-06	8e-06	3.6e-06	4.97e-06	6.85e-06	8.26e-06	6e-06	6.39e-06	7.93e-06	5.64e-06	6.14e-06	7.83e-06	3.82e-06	3.28e-06	6.16e-06	6.74e-06	5.17e-06	6.08e-06	6.02e-06	5.49e-06	6.92e-06	8.31e-06	3.82e-06	5.74e-06	5.74e-06	5.14e-06	9.01e-06	5.88e-06	6.12e-05	1.756e-05	7.39e-06	8.89e-06	4.05e-06	5.96e-06	4.88e-06	7.57e-06
1057	25	PND200	8.92e-06	4.69e-06	6.66e-06	6.97e-06	4.49e-06	4.09e-06	5.81e-06	8.33e-06	7.76e-06	5.56e-06	3.63e-06	3.41e-06	6.77e-06	4.99e-06	5.88e-06	6.21e-06	4.1e-06	7.16e-06	5.79e-06	4.42e-06	6.04e-06	7.95e-06	7.31e-06	9.12e-06	9.15e-06	4.77e-06	6.12e-06	5.34e-06	6.61e-06	4.79e-06	3.42e-06	4.53e-06	7.17e-06	3.21e-06	6.79e-06	7.7e-06	6.14e-06	1.402e-05	1.117e-05	6.462e-05	3.441e-05	4.2e-06	6.71e-06	8.22e-06	3.37e-06	4.25e-06	8.72e-06
1307	25	PND200	6.52e-06	6.38e-06	6e-06	5.81e-06	4.02e-06	7.84e-06	9.4e-06	1.21e-05	6.27e-06	6.66e-06	1.09e-05	6.69e-06	7.47e-06	8.59e-06	6.34e-06	6.43e-06	4.07e-06	7.32e-06	6.14e-06	6.67e-06	5.32e-06	4.36e-06	9.33e-06	6.53e-06	7.26e-06	7.71e-06	5.92e-06	6.77e-06	6.32e-06	9.94e-06	9.36e-06	5.14e-06	7.7e-06	7.33e-06	7.17e-06	4.84e-06	5.92e-06	1.054e-05	7.9e-06	8.162e-05	2.235e-05	1.86e-06	6.41e-06	5.55e-06	4.53e-06	6.97e-06	1.072e-05
673	25	PND200	5.33e-06	5.87e-06	6.5e-06	6.63e-06	7.39e-06	4.37e-06	8.69e-06	6.88e-06	7.31e-06	9.03e-06	8.8e-06	7.32e-06	6.7e-06	5.37e-06	7.42e-06	6.16e-06	6.31e-06	7.33e-06	6.95e-06	3.73e-06	8.32e-06	5.29e-06	7.46e-06	8.57e-06	8.28e-06	2.68e-06	7.52e-06	6.93e-06	8.57e-06	9.85e-06	6.51e-06	7.86e-06	6.52e-06	5.71e-06	1.057e-05	3.42e-06	5.21e-06	1.332e-05	1.026e-05	9.257e-05	2.24e-05	7.71e-06	5.38e-06	3.33e-06	5.07e-06	5.9e-06	5.29e-06
819	25	PND200	6.02e-06	4.82e-06	8.36e-06	6.23e-06	5.58e-06	3.39e-06	4.96e-06	5.24e-06	5.09e-06	3.96e-06	7.39e-06	5.86e-06	5.64e-06	7.23e-06	7.48e-06	3.43e-06	6.72e-06	5.56e-06	2.81e-06	4.32e-06	7.85e-06	8.14e-06	5.39e-06	6.41e-06	6.88e-06	6.01e-06	4.66e-06	4.78e-06	5.39e-06	6.45e-06	4.83e-06	4.27e-06	7.6e-06	5.37e-06	5.52e-06	3.69e-06	5.37e-06	4.785e-05	1.083e-05	4.43e-05	2.256e-05	6.3e-06	5.84e-06	5.93e-06	7.11e-06	5.51e-06	3.62e-06
965	25	PND200	4.94e-06	3.6e-06	6.16e-06	4.35e-06	5.79e-06	5.91e-06	1.008e-05	7.71e-06	9.26e-06	4.81e-06	5.48e-06	4.86e-06	6.35e-06	3.45e-06	6.58e-06	4.58e-06	4.58e-06	5.26e-06	8.38e-06	9.78e-06	6.63e-06	6.66e-06	5.38e-06	5.53e-06	4.81e-06	6.11e-06	4.71e-06	5.91e-06	5.72e-06	6.05e-06	1.337e-05	4.77e-06	5.15e-06	7.13e-06	5.24e-06	5.08e-06	3.4e-06	2.924e-05	1.138e-05	9.751e-05	1.458e-05	4.09e-06	3.72e-06	7.01e-06	8.61e-06	3.48e-06	7.92e-06
995	25	PND200	3.46e-06	2.41e-06	5.29e-06	4.9e-06	4.29e-06	6.41e-06	3.71e-06	4.13e-06	4.53e-06	3.79e-06	3.84e-06	3.31e-06	4.25e-06	4.81e-06	3.02e-06	5.68e-06	3.84e-06	5.43e-06	6.22e-06	4.28e-06	8.54e-06	2.9e-06	3.69e-06	4.34e-06	2.98e-06	3.5e-06	3.97e-06	4.46e-06	5.08e-06	4.83e-06	6.31e-06	6.21e-06	5.31e-06	5.57e-06	3.34e-06	6.84e-06	3.18e-06	1.693e-05	7.59e-06	2.132e-05	6.733e-05	4.59e-06	6.72e-06	4.3e-06	4.76e-06	5.3e-06	4.35e-06
1100A	250	PND21	5.59775e-06	6.03772e-06	4.85045e-06	4.43625e-06	2.99931e-06	3.61949e-06	3.70704e-06	6.38723e-06	8.37512e-06	6.09864e-06	5.54354e-06	5.03497e-06	5.13018e-06	5.68788e-06	3.12007e-06	4.97327e-06	4.17064e-06	5.31206e-06	4.37089e-06	6.11851e-06	1.07815e-05	7.13016e-06	4.78907e-06	4.918e-06	6.2095e-06	4.44485e-06	4.26618e-06	4.25532e-06	2.52229e-06	4.11153e-06	4.80898e-06	4.97628e-06	5.03333e-06	3.80479e-06	6.02718e-06	5.12446e-06	3.82244e-06	1.4568e-05	6.61087e-06	5.66913e-05	1.58726e-05	6.50456e-06	5.06155e-06	5.67442e-06	5.84548e-06	6.57e-06	5.13138e-06
391A	250	PND21	7.87e-06	6.6e-06	7.62e-06	4.74e-06	8.2e-06	4.77e-06	4.83e-06	4.47e-06	7.22e-06	9.87e-06	1.083e-05	1.059e-05	7.45e-06	7.03e-06	3.97e-06	5.84e-06	8.96e-06	8.72e-06	7.4e-06	1.392e-05	5.31e-06	5.17e-06	7.49e-06	7.59e-06	8.85e-06	9.27e-06	8.74e-06	7.9e-06	7.34e-06	9.12e-06	7.87e-06	6.99e-06	7.96e-06	9.54e-06	7.64e-06	9.21e-06	8.65e-06	1.97e-05	2.765e-05	0.00013772	1.037e-05	1.207e-05	8.51e-06	8.72e-06	7.01e-06	7.02e-06	9.25e-06
1103A	250	PND21	5.26e-06	4.89e-06	5.51e-06	4.79e-06	6.5e-06	8.12e-06	5.18e-06	6.42e-06	4.11e-06	4.1e-06	4.49e-06	4.97e-06	6.94e-06	3.78e-06	5.78e-06	6.19e-06	3.66e-06	2.8e-06	7.91e-06	6.91e-06	5.44e-06	3.99e-06	3.3e-06	4.39e-06	7.73e-06	4.36e-06	6.72e-06	5.21e-06	4.53e-06	4.72e-06	6.23e-06	4.24e-06	5.98e-06	4.98e-06	3.03e-06	5.2e-06	4.78e-06	4.112e-05	1.908e-05	5.81e-05	5.99e-06	4.75e-06	5.67e-06	8.68e-06	5.33e-06	6.85e-06	5.39e-06
1112A	250	PND21	4.71e-06	5.46e-06	5.75e-06	2.12e-06	6.92e-06	5.95e-06	5.93e-06	3.7e-06	6.47e-06	7.49e-06	6.68e-06	7.14e-06	7.47e-06	8.65e-06	4.89e-06	7.01e-06	6.58e-06	8.58e-06	6.52e-06	6.22e-06	3.38e-06	7.02e-06	5.36e-06	4.35e-06	8.19e-06	6.53e-06	4.15e-06	3.93e-06	3.73e-06	4.62e-06	6.88e-06	6.24e-06	7.54e-06	4.74e-06	4.65e-06	4.74e-06	5.6e-06	2.877e-05	1.829e-05	4.423e-05	5.76e-06	8.27e-06	5.96e-06	8.06e-06	6.23e-06	3.74e-06	5.67e-06
457A	250	PND21	6.37e-06	2.91e-06	3.16e-06	3.18e-06	9.72e-06	5.02e-06	3.16e-06	5.68e-06	3.36e-06	5.44e-06	5.6e-06	4.52e-06	4.42e-06	5.37e-06	5.52e-06	2.38e-06	4.71e-06	6.08e-06	3.07e-06	4.01e-06	4.15e-06	3.39e-06	3.04e-06	4.65e-06	4.65e-06	3.99e-06	4.55e-06	6e-06	4.01e-06	6.21e-06	4.93e-06	5.21e-06	4.54e-06	4.56e-06	5.6e-06	3.41e-06	6.11e-06	3.398e-05	1.423e-05	5.353e-05	4.67e-06	4.73e-06	5.59e-06	5.08e-06	6.38e-06	7.72e-06	6.22e-06
1096A	250	PND21	2.88e-06	4.54e-06	4.07e-06	3.69e-06	2.79e-06	3.89e-06	4.72e-06	2.61e-06	5.64e-06	5.7e-06	4.45e-06	3.02e-06	3.94e-06	5.11e-06	1.93e-06	6.65e-06	6.65e-06	3.66e-06	3.87e-06	6.62e-06	5.3e-06	4.07e-06	7.73e-06	5.39e-06	3.33e-06	4.77e-06	6.55e-06	3.65e-06	4.27e-06	3.71e-06	4.76e-06	3.39e-06	3.46e-06	6.44e-06	6.54e-06	4.77e-06	3.45e-06	4.017e-05	1.309e-05	5.007e-05	4.95e-06	4.28e-06	7.39e-06	3.73e-06	3.73e-06	4.63e-06	4.16e-06
437A	250	PND21	7.77e-06	4.74e-06	6.03e-06	6.97e-06	6.1e-06	4.4e-06	4.13e-06	3.92e-06	6.72e-06	6.72e-06	4.36e-06	4.76e-06	4.43e-06	6.22e-06	8.16e-06	3.46e-06	4.15e-06	4.09e-06	8.16e-06	6.85e-06	5.02e-06	5.92e-06	7.65e-06	5.7e-06	6.67e-06	5.45e-06	2.82e-06	6.69e-06	5.45e-06	7.82e-06	3.65e-06	7.41e-06	8.35e-06	5.87e-06	4.92e-06	7.21e-06	5.84e-06	4.306e-05	2.128e-05	8.679e-05	5.95e-06	5.65e-06	5.43e-06	3.48e-06	5.34e-06	7.98e-06	1.073e-05
458A	250	PND21	8.07e-06	6.28e-06	6.11e-06	4.69e-06	3.14e-06	4.8e-06	5.44e-06	4.63e-06	7.33e-06	6.76e-06	8.11e-06	6.79e-06	4.34e-06	7.16e-06	8.17e-06	8.07e-06	3.02e-06	5.62e-06	5.57e-06	5.54e-06	9.01e-06	4.9e-06	7.48e-06	8.7e-06	8.53e-06	4.64e-06	4.31e-06	6.36e-06	4.57e-06	5.69e-06	6.46e-06	4.32e-06	5.26e-06	1.113e-05	6.04e-06	6.05e-06	7.86e-06	8.54e-06	3.087e-05	0.00015388	5.8e-06	6.89e-06	7.55e-06	4.98e-06	6.65e-06	6.35e-06	4.94e-06
481A	250	PND21	5.77e-06	5.35e-06	4.8e-06	5.49e-06	6.08e-06	5.3e-06	5.36e-06	3.91e-06	4.62e-06	6.98e-06	4.69e-06	7.98e-06	8.39e-06	7.65e-06	6.57e-06	5.23e-06	7.57e-06	7.2e-06	3.98e-06	6.62e-06	6.16e-06	3.41e-06	7.71e-06	4.5e-06	5.75e-06	5.22e-06	4.95e-06	8.95e-06	8.26e-06	7.64e-06	7.02e-06	4.95e-06	5.89e-06	8.05e-06	4.26e-06	4.91e-06	4.38e-06	3.028e-05	2.003e-05	8.24e-05	7.67e-06	6.01e-06	6.55e-06	3.25e-06	4.39e-06	7.44e-06	9.51e-06
1103B	250	PND50	5.33e-06	6.28e-06	4.53e-06	4.14e-06	3.67e-06	8.01e-06	7.07e-06	7.93e-06	7.19e-06	5.11e-06	6.2e-06	9.16e-06	4.3e-06	4.98e-06	6.38e-06	1.125e-05	3.36e-06	6.15e-06	8.39e-06	4.47e-06	4.17e-06	1.027e-05	6.28e-06	7.51e-06	1.06e-05	7.76e-06	3.17e-06	9.15e-06	5.03e-06	6.84e-06	4.77e-06	6.24e-06	5.59e-06	8.68e-06	6.86e-06	3.41e-06	4.26e-06	1.985e-05	1.352e-05	9.958e-05	1.115e-05	7.05e-06	8.75e-06	6.69e-06	4.47e-06	8.58e-06	7.3e-06
391B	250	PND50	9.09e-06	6.84e-06	8.54e-06	9.89e-06	8.08e-06	1.255e-05	8.29e-06	7.13e-06	6.37e-06	7.46e-06	4.81e-06	7.3e-06	6.33e-06	6.12e-06	5.27e-06	6.89e-06	4.48e-06	5.75e-06	9.36e-06	7.76e-06	8.02e-06	3.5e-06	7.96e-06	7.03e-06	9.9e-06	7.7e-06	7.35e-06	7.42e-06	5.5e-06	5.93e-06	7.6e-06	6.64e-06	6.27e-06	1.255e-05	9.6e-06	3.97e-06	6.63e-06	1.719e-05	1.299e-05	8.463e-05	8.44e-06	7.58e-06	6.5e-06	6.34e-06	8.79e-06	5.29e-06	9.17e-06
1345	250	PND50	7.14e-06	5.59e-06	7.2e-06	3.75e-06	3.52e-06	7.48e-06	6.08e-06	7.88e-06	6.24e-06	5.84e-06	5.38e-06	6.41e-06	7.82e-06	6.24e-06	7.29e-06	5.94e-06	4.57e-06	8.88e-06	5.27e-06	4.57e-06	6.75e-06	4.21e-06	6.45e-06	4.92e-06	9.59e-06	2.73e-06	9.77e-06	8.6e-06	6.44e-06	7.98e-06	7.47e-06	5.1e-06	7.71e-06	6.73e-06	4.41e-06	7.31e-06	4.61e-06	3.311e-05	1.043e-05	6.463e-05	1.237e-05	6.29e-06	9.36e-06	7.06e-06	6.71e-06	1.132e-05	6.57e-06
301B	250	PND50	5.05e-06	7.26e-06	5.14e-06	7.56e-06	9.66e-06	7.15e-06	5.45e-06	6.92e-06	6.72e-06	2.99e-06	5.61e-06	4.31e-06	6.25e-06	4.59e-06	4.21e-06	5.05e-06	6.31e-06	7.46e-06	7.34e-06	9.14e-06	9.04e-06	5.26e-06	6e-06	6.27e-06	3.66e-06	6.59e-06	5.31e-06	4.02e-06	7.22e-06	7.58e-06	5e-06	5.99e-06	3.5e-06	3.91e-06	7.37e-06	7.89e-06	5.85e-06	6.809e-05	2.216e-05	0.00010712	1.064e-05	8.16e-06	6.59e-06	3.84e-06	7.19e-06	6.97e-06	1.094e-05
457B	250	PND50	5.48e-06	8.28e-06	1.028e-05	6.06e-06	8.1e-06	5.83e-06	6.08e-06	6.71e-06	5.39e-06	6.97e-06	5.41e-06	6.95e-06	5.69e-06	4.04e-06	6.38e-06	4.61e-06	8.99e-06	5.89e-06	6.26e-06	1.022e-05	6.12e-06	7.04e-06	6.2e-06	5.67e-06	5.85e-06	7.53e-06	1.006e-05	5.94e-06	6.27e-06	6.85e-06	5.3e-06	4.64e-06	7.09e-06	7.69e-06	5.51e-06	7.87e-06	5.56e-06	2.606e-05	2.117e-05	9.799e-05	1.229e-05	6.46e-06	8.82e-06	7.13e-06	4.18e-06	8.08e-06	9e-06
522B	250	PND50	7.53e-06	8.56e-06	4.92e-06	6.36e-06	3.95e-06	4.68e-06	5.62e-06	6.67e-06	8.17e-06	9.49e-06	5.09e-06	8.21e-06	4.04e-06	6.71e-06	7.37e-06	6.95e-06	5.17e-06	1.004e-05	7.32e-06	7.49e-06	8.35e-06	4.68e-06	7.47e-06	1.216e-05	5.04e-06	5.93e-06	9.02e-06	7.82e-06	7.5e-06	7.27e-06	7.89e-06	1.158e-05	7.76e-06	7.69e-06	4.12e-06	8.16e-06	8.43e-06	2.951e-05	1.377e-05	5.45e-05	8.88e-06	7.26e-06	5.96e-06	4.33e-06	8.37e-06	6.93e-06	5.19e-06
437B	250	PND50	3.69e-06	5.85e-06	6.17e-06	5.84e-06	5.13e-06	6.13e-06	7.29e-06	4.75e-06	8.29e-06	6.95e-06	8.12e-06	6.3e-06	4.57e-06	4.36e-06	6.47e-06	6.3e-06	7.45e-06	6.5e-06	5.57e-06	5.83e-06	6.42e-06	4.71e-06	5.37e-06	6.65e-06	8.33e-06	4.64e-06	5.52e-06	8.46e-06	5.3e-06	6.09e-06	6.36e-06	7.59e-06	4.56e-06	6.02e-06	7.26e-06	6.3e-06	4.53e-06	1.711e-05	1.001e-05	0.0001274	1.901e-05	8.87e-06	6.86e-06	5.18e-06	5.38e-06	6.75e-06	4.23e-06
458B	250	PND50	6.81e-06	4.88e-06	7.7e-06	5.74e-06	4.47e-06	5.75e-06	8.56e-06	9.46e-06	1.15e-06	7.94e-06	4.63e-06	4.03e-06	7.58e-06	6.21e-06	8.06e-06	4.72e-06	6.35e-06	4.31e-06	6.44e-06	6.36e-06	4.64e-06	6e-06	8.38e-06	6.17e-06	4.39e-06	6.98e-06	1.139e-05	8.22e-06	7.95e-06	6.75e-06	6.4e-06	8.52e-06	6.33e-06	6.07e-06	6.92e-06	4.2e-06	4.82e-06	1.476e-05	2.267e-05	0.00010047	6.67e-06	6.67e-06	6.87e-06	6.02e-06	3.41e-06	8.85e-06	4.75e-06
481B	250	PND50	5.65e-06	6.96e-06	4e-06	5.21e-06	5.71e-06	4.69e-06	4.67e-06	6.85e-06	4.43e-06	4.23e-06	3.22e-06	5.45e-06	5.77e-06	7.01e-06	5.2e-06	7.4e-06	8.02e-06	6.81e-06	5.7e-06	7.28e-06	9.64e-06	8.98e-06	7.97e-06	3.7e-06	5.61e-06	4.6e-06	5.37e-06	9.41e-06	3.89e-06	4.1e-06	6.93e-06	8.89e-06	5.49e-06	6.59e-06	6.26e-06	5.14e-06	6.87e-06	1.333e-05	1.114e-05	7.271e-05	8.69e-06	7.09e-06	9.09e-06	4.9e-06	5.4e-06	9.28e-06	1.051e-05
741	250	PND90	3.29e-06	3.15e-06	8.78e-06	5.4e-06	9.87e-06	7.35e-06	6.48e-06	4.76e-06	6.97e-06	5.36e-06	4.41e-06	7.02e-06	6.93e-06	6.01e-06	3.4e-06	6.59e-06	5.97e-06	4.47e-06	6e-06	6.45e-06	7.57e-06	4.72e-06	3.73e-06	4.67e-06	4.23e-06	5.22e-06	7.94e-06	6.12e-06	6.23e-06	1.008e-05	7.46e-06	7.06e-06	8.36e-06	6.16e-06	6.96e-06	5.71e-06	4.77e-06	1.468e-05	9e-06	7.937e-05	3.8e-06	7.73e-06	8e-06	5.38e-06	5.56e-06	6.35e-06	7.1e-06
772	250	PND90	5.05e-06	7.31e-06	6.47e-06	5.86e-06	8.55e-06	5.51e-06	5.56e-06	6.14e-06	8.89e-06	6.83e-06	6.72e-06	5.42e-06	6.43e-06	5.81e-06	4.54e-06	5.37e-06	7.59e-06	6.5e-06	5.62e-06	7.82e-06	5.95e-06	5.72e-06	7.85e-06	6e-06	4.99e-06	8.34e-06	7.74e-06	7.37e-06	8.39e-06	8.26e-06	6.93e-06	7.25e-06	1.037e-05	6.42e-06	8.64e-06	7.2e-06	9.6e-06	7.307e-05	2.213e-05	8.585e-05	1.187e-05	5.43e-06	6.69e-06	7.37e-06	4.72e-06	5.31e-06	5.98e-06
823	250	PND90	5e-06	5.4e-06	7.24e-06	3.38e-06	4.57e-06	2.66e-06	6.22e-06	3.99e-06	4.72e-06	4.03e-06	8.03e-06	5.1e-06	5.47e-06	3.9e-06	5.08e-06	6.37e-06	7.15e-06	6.97e-06	5.6e-06	6.84e-06	6.48e-06	4.04e-06	2.63e-06	3.36e-06	4.6e-06	6.27e-06	2.71e-06	3.81e-06	6.15e-06	4.94e-06	4.62e-06	5.73e-06	5.32e-06	6.77e-06	5.46e-06	4.48e-06	5.42e-06	3.896e-05	1.228e-05	6.329e-05	2.967e-05	3.72e-06	2.99e-06	5.49e-06	5.2e-06	4.55e-06	5.58e-06
864	250	PND90	4.47e-06	4.02e-06	3.28e-06	6.19e-06	1.057e-05	4.92e-06	4.94e-06	6.08e-06	3.18e-06	6.42e-06	4.71e-06	4.69e-06	6.55e-06	8.14e-06	3.65e-06	6.72e-06	3.38e-06	5.89e-06	5.93e-06	6.87e-06	6.25e-06	8.18e-06	5.37e-06	7.33e-06	6.83e-06	6.99e-06	4.74e-06	4.78e-06	5.3e-06	4.39e-06	7.5e-06	8.05e-06	4.1e-06	4.6e-06	4.63e-06	6.08e-06	4.48e-06	2.141e-05	9.57e-06	9.051e-05	1.825e-05	4.71e-06	3.76e-06	6.57e-06	4.04e-06	2.88e-06	7.43e-06
1355	250	PND90	1.066e-05	6.96e-06	8.78e-06	9.59e-06	5.97e-06	1.006e-05	9.43e-06	8.75e-06	4.39e-06	5.4e-06	5.21e-06	6.43e-06	7.39e-06	5.42e-06	2.81e-06	3.45e-06	4.51e-06	8.75e-06	7.32e-06	8.73e-06	6.88e-06	6.56e-06	8.36e-06	7.72e-06	1.157e-05	5.71e-06	6.84e-06	6.85e-06	5.5e-06	4.66e-06	5.33e-06	3.24e-06	5.4e-06	4.56e-06	4e-06	5.81e-06	5.27e-06	6.06e-06	1.547e-05	8.701e-05	4.95e-06	6.85e-06	1.138e-05	5.53e-06	6.71e-06	3.4e-06	9.59e-06
609	250	PND90	5.07e-06	6.82e-06	6.73e-06	6.12e-06	7.62e-06	7.23e-06	5.13e-06	8.34e-06	5.45e-06	5.6e-06	6.04e-06	5.78e-06	7.92e-06	7.34e-06	7.31e-06	5.4e-06	5.59e-06	9.91e-06	5.4e-06	3.23e-06	3.97e-06	3.02e-06	7.27e-06	5.17e-06	6.51e-06	4.46e-06	4.92e-06	6.17e-06	6.94e-06	7.62e-06	8.41e-06	9.59e-06	1.045e-05	4.31e-06	5.03e-06	6.54e-06	6.25e-06	2.475e-05	1.334e-05	8.137e-05	1.405e-05	6.36e-06	7.8e-06	4.84e-06	4.67e-06	4.16e-06	7.44e-06
661	250	PND90	6.36e-06	3.7e-06	6.39e-06	5.44e-06	8.05e-06	6.02e-06	3.58e-06	5.52e-06	7.07e-06	7e-06	7.69e-06	4.73e-06	8.66e-06	6.52e-06	6.64e-06	3.66e-06	5.25e-06	6.5e-06	6.17e-06	5.87e-06	5.59e-06	2.58e-06	6.17e-06	7.43e-06	6.45e-06	5.02e-06	6.52e-06	8.17e-06	4.6e-06	7.74e-06	4.89e-06	5.62e-06	5.52e-06	5.24e-06	6.6e-06	3.89e-06	7.03e-06	2.117e-05	6.92e-06	7.108e-05	2.182e-05	6.38e-06	5.57e-06	5.92e-06	6.2e-06	4.92e-06	6.27e-06
752	250	PND90	5.51e-06	1.313e-05	7.27e-06	5.92e-06	4.9e-06	5.56e-06	7.76e-06	5.59e-06	4.74e-06	7.42e-06	7.13e-06	6.75e-06	7.07e-06	6.17e-06	3.92e-06	6.72e-06	6.65e-06	1.092e-05	8.33e-06	9.32e-06	2.47e-06	7.56e-06	4.71e-06	9.35e-06	5.41e-06	7.74e-06	6.66e-06	7.2e-06	1.023e-05	6e-06	6.33e-06	2.54e-06	4.7e-06	7.99e-06	6.64e-06	8.19e-06	5.36e-06	9.44e-06	6.33e-06	9.402e-05	1.83e-05	6.59e-06	6.91e-06	1.152e-05	9.03e-06	1.087e-05	8.11e-06
756	250	PND90	5.27e-06	5.02e-06	5.43e-06	5.44e-06	4.67e-06	4.93e-06	3.27e-06	5.54e-06	8.32e-06	4.73e-06	8.12e-06	3.5e-06	8.2e-06	3.82e-06	6.11e-06	6.94e-06	1.182e-05	8.94e-06	7.05e-06	7.77e-06	5.75e-06	6.03e-06	3.81e-06	6.41e-06	5.71e-06	3.44e-06	5.91e-06	4.77e-06	6.17e-06	5.44e-06	7e-06	4.94e-06	5.64e-06	5.96e-06	4.94e-06	3.93e-06	7.75e-06	3.201e-05	1.062e-05	7.306e-05	1.841e-05	5.33e-06	1.57e-06	6.49e-06	5.12e-06	9.17e-06	7.81e-06
1047	250	PND90	3.44e-06	3.55e-06	6.6e-06	5.99e-06	4.25e-06	5.1e-06	6.34e-06	4.22e-06	4.92e-06	6.34e-06	3.3e-06	6.49e-06	4.95e-06	4.6e-06	4.88e-06	6.47e-06	5.76e-06	6.3e-06	7.86e-06	5.72e-06	4.56e-06	6.76e-06	5.96e-06	4.98e-06	4.95e-06	7.64e-06	6.66e-06	7.09e-06	7.47e-06	4.39e-06	4.66e-06	6.68e-06	5e-06	5.95e-06	5.77e-06	5.65e-06	3.8e-06	1.481e-05	4.64e-06	6.36e-05	3.218e-05	3.78e-06	5.06e-06	5.1e-06	6.9e-06	5.72e-06	5.02e-06
708	250	PND140	4.10699e-06	3.74851e-06	7.10957e-06	5.76941e-06	9.5109e-06	4.20141e-06	7.15034e-06	6.00511e-06	5.79731e-06	3.52962e-06	4.09477e-06	3.16204e-06	6.69545e-06	7.27221e-06	3.23061e-06	4.4979e-06	3.15684e-06	4.01051e-06	6.7035e-06	3.67018e-06	5.14752e-06	7.14124e-06	6.82178e-06	8.08742e-06	6.28106e-06	9.42429e-06	6.46339e-06	7.64711e-06	6.83409e-06	8.196e-06	6.62557e-06	4.716e-06	3.42227e-06	3.96696e-06	5.92767e-06	6.50894e-06	3.94934e-06	1.4148e-05	1.96132e-06	5.59474e-05	1.37029e-05	4.60863e-06	4.01948e-06	6.06145e-06	5.96885e-06	5.97605e-06	4.08507e-06
740f	250	PND140	7.44e-06	4.63e-06	3.15e-06	4.77e-06	6.59e-06	6.56e-06	4.62e-06	7.34e-06	4.92e-06	3.74e-06	5.85e-06	3.49e-06	4.99e-06	2.25e-06	2.11e-06	4.23e-06	3.21e-06	4.7e-06	9.6e-06	5.18e-06	1.011e-05	6.04e-06	6.82e-06	5.86e-06	5.05e-06	3.29e-06	3.55e-06	5.46e-06	5.96e-06	4.55e-06	5.26e-06	4.57e-06	5.96e-06	4.03e-06	5.02e-06	4.83e-06	5.92e-06	4.73e-06	4.06e-06	4.64e-05	1.282e-05	6.21e-06	6.09e-06	7.47e-06	5.69e-06	4.59e-06	4.99e-06
608	250	PND140	5.8e-06	7.36e-06	4.06e-06	5.48e-06	3.97e-06	5.2e-06	6.28e-06	6.18e-06	1.117e-05	5.92e-06	6.07e-06	7.16e-06	5.62e-06	7e-06	5.22e-06	5.61e-06	6.91e-06	4.5e-06	7.11e-06	4.76e-06	3.94e-06	5.11e-06	5.79e-06	7.4e-06	7.76e-06	3.96e-06	5.73e-06	3.64e-06	4.73e-06	4.88e-06	5.17e-06	5.9e-06	5.05e-06	3.26e-06	5.47e-06	8.11e-06	4.72e-06	5.73e-06	6.36e-06	6.545e-05	1.336e-05	5e-06	7.06e-06	8.01e-06	7.29e-06	7.94e-06	7.13e-06
705	250	PND140	4.43e-06	5.32e-06	5.08e-06	3.55e-06	4.12e-06	4.27e-06	4.48e-06	3.99e-06	5.29e-06	4.44e-06	4.17e-06	3.47e-06	3.61e-06	4.22e-06	5.99e-06	3.76e-06	4.42e-06	3.73e-06	6.11e-06	5.7e-06	5.9e-06	3.91e-06	5.3e-06	3.91e-06	5.68e-06	6.7e-06	3.8e-06	4.86e-06	4.02e-06	1.93e-06	4.53e-06	5.62e-06	3.64e-06	3.24e-06	2.07e-06	5.01e-06	5.82e-06	2.379e-05	8.79e-06	7.055e-05	4.145e-05	4.8e-06	3.33e-06	2.86e-06	5.35e-06	2.81e-06	6.29e-06
753	250	PND140	7.64e-06	6.09e-06	6.17e-06	3.14e-06	4.63e-06	5.57e-06	1.063e-05	5.46e-06	3.19e-06	6.18e-06	9.79e-06	6.46e-06	9.72e-06	7.14e-06	5.17e-06	5.98e-06	5.05e-06	5.65e-06	7.53e-06	6.15e-06	8.24e-06	6.64e-06	6.88e-06	7.96e-06	6.73e-06	4.23e-06	6.35e-06	5.88e-06	6.06e-06	2.95e-06	6.09e-06	2.8e-06	4.84e-06	6.72e-06	6.16e-06	4.7e-06	3.24e-06	1.242e-05	8.09e-06	8.168e-05	1.005e-05	6.15e-06	7.92e-06	8.38e-06	4.98e-06	4.61e-06	7.05e-06
757	250	PND140	5.02e-06	6.5e-06	4.86e-06	3.74e-06	4.87e-06	4.72e-06	5.11e-06	5.83e-06	6.73e-06	6.75e-06	8.23e-06	6.15e-06	6.55e-06	3.11e-06	4.45e-06	4.1e-06	6.07e-06	7.54e-06	4.23e-06	1.97e-06	4.45e-06	9.39e-06	5.18e-06	8.08e-06	7.51e-06	5.46e-06	5.99e-06	4.58e-06	5.27e-06	4.18e-06	6.22e-06	7.5e-06	7.34e-06	7.43e-06	4.32e-06	3.91e-06	5.09e-06	3.251e-05	7.96e-06	7.59e-05	1.915e-05	5.05e-06	6.26e-06	5.55e-06	7.17e-06	5.26e-06	3.44e-06
773	250	PND140	8.4e-06	6.72e-06	5.54e-06	2.66e-06	3.13e-06	3.75e-06	3.19e-06	6.58e-06	6.07e-06	7.07e-06	6.08e-06	5.34e-06	3.78e-06	8.26e-06	6.42e-06	4.48e-06	4.04e-06	6.1e-06	7.35e-06	3.85e-06	4.74e-06	4.98e-06	7.11e-06	5.36e-06	5.13e-06	6.44e-06	3.55e-06	5.21e-06	4.82e-06	5.52e-06	5.48e-06	3.93e-06	5.93e-06	5.95e-06	5.84e-06	5.89e-06	3.55e-06	1.622e-05	1.055e-05	9.084e-05	1.638e-05	6.93e-06	3.87e-06	4.51e-06	3.22e-06	6.55e-06	4.3e-06
824	250	PND140	2.5e-06	2.99e-06	4.02e-06	5.56e-06	2.75e-06	3.35e-06	6.28e-06	3.17e-06	3.6e-06	4.41e-06	5.92e-06	5.53e-06	3.52e-06	3.64e-06	3.04e-06	4.86e-06	4.24e-06	3.9e-06	5.11e-06	5.5e-06	5.04e-06	3.62e-06	2.17e-06	3.46e-06	4.91e-06	5.68e-06	3.75e-06	6.17e-06	1.129e-05	5.06e-06	5.38e-06	4.41e-06	5.48e-06	4.92e-06	3.83e-06	9.2e-06	5.49e-06	1.982e-05	6.45e-06	8.225e-05	3.149e-05	4.13e-06	4.14e-06	6.94e-06	6.47e-06	7.44e-06	6.46e-06
660	250	PND140	4.12e-06	5.15e-06	3.89e-06	2.4e-06	2.96e-06	4.55e-06	5.24e-06	6.18e-06	4.15e-06	3.81e-06	5.15e-06	4.41e-06	7.13e-06	5.07e-06	8.9e-06	4.28e-06	5.16e-06	5.42e-06	5.19e-06	4.03e-06	4.9e-06	4.06e-06	4.41e-06	4.16e-06	3.43e-06	5.38e-06	3.15e-06	4.62e-06	3.42e-06	5.01e-06	4.8e-06	4.65e-06	4.2e-06	7.07e-06	5.97e-06	6.26e-06	3.25e-06	3.44e-06	3.95e-06	4.42e-05	2.935e-05	7.14e-06	4.64e-06	3.02e-06	5.02e-06	4.37e-06	4.8e-06
771	250	PND200	5.16e-06	8.05e-06	9.19e-06	5.28e-06	2.38e-06	1.546e-05	1.311e-05	5.01e-06	8.54e-06	8.09e-06	5.81e-06	7.34e-06	9.26e-06	1.064e-05	9.5e-06	1.139e-05	6.57e-06	1.072e-05	7.24e-06	1.151e-05	1.138e-05	3.43e-06	9.55e-06	1.102e-05	7.7e-06	8.57e-06	8.46e-06	1.398e-05	8.64e-06	8.99e-06	7.86e-06	9.6e-06	9.51e-06	1.253e-05	8.09e-06	6.59e-06	7.29e-06	1.268e-05	1.528e-05	8.283e-05	7.44e-06	8.39e-06	5.36e-06	5.53e-06	7.88e-06	6.2e-06	5.01e-06
659	250	PND200	6.24e-06	5.85e-06	3.87e-06	6.9e-06	5.63e-06	6.2e-06	3.83e-06	7.03e-06	6.3e-06	4.69e-06	5.55e-06	4.34e-06	4.91e-06	7.51e-06	4.43e-06	3.82e-06	6.92e-06	4.66e-06	7.13e-06	3.87e-06	7.47e-06	7.4e-06	5.38e-06	5.87e-06	3.76e-06	6.54e-06	5.59e-06	6.26e-06	8.75e-06	5.98e-06	5.63e-06	8.59e-06	4.23e-06	4.32e-06	5.85e-06	7.22e-06	6.8e-06	1.296e-05	5.27e-06	6.081e-05	2.352e-05	5.55e-06	3.76e-06	7.43e-06	5.38e-06	5.43e-06	4.8e-06
704	250	PND200	3.75e-06	5.42e-06	5.12e-06	4.61e-06	7.57e-06	5.74e-06	2.76e-06	7.62e-06	5.81e-06	3.99e-06	6.26e-06	7.73e-06	6.25e-06	4.09e-06	6.12e-06	5.2e-06	4.97e-06	5.33e-06	3.69e-06	2.72e-06	2.93e-06	5.71e-06	2.41e-06	6.62e-06	6.9e-06	7.57e-06	6.48e-06	7.1e-06	6.71e-06	6.93e-06	4.84e-06	5.33e-06	4.42e-06	6.56e-06	8.04e-06	5.23e-06	4.9e-06	4.08e-05	8.98e-06	6.907e-05	2.925e-05	4.59e-06	6.44e-06	6.51e-06	6.82e-06	5.9e-06	6.48e-06
709	250	PND200	7.15e-06	5.58e-06	3.13e-06	6.16e-06	5.64e-06	4.4e-06	3.13e-06	4.77e-06	3.76e-06	6.72e-06	5.69e-06	3.91e-06	4.26e-06	4.02e-06	4.41e-06	5.86e-06	7.33e-06	5.71e-06	6.77e-06	3.6e-06	4.12e-06	6.26e-06	4.33e-06	2.38e-06	3.78e-06	3.7e-06	4.28e-06	6.47e-06	6.79e-06	5.89e-06	4.51e-06	3.49e-06	6.16e-06	6.59e-06	7.06e-06	5.07e-06	5.86e-06	7.97e-06	6.51e-06	5.269e-05	2.323e-05	4.19e-06	6.6e-06	4.9e-06	6.35e-06	3.2e-06	5.93e-06
751	250	PND200	8.93e-06	3.54e-06	7.04e-06	7.21e-06	5.1e-06	9.54e-06	6e-06	5.8e-06	7.94e-06	6.52e-06	3.41e-06	9.05e-06	6.2e-06	5.51e-06	8.24e-06	7.69e-06	6.46e-06	6.64e-06	7.87e-06	7.71e-06	9.13e-06	9.29e-06	5.39e-06	3.74e-06	8.56e-06	8.03e-06	8.27e-06	5.41e-06	8.81e-06	6.89e-06	1.022e-05	4.58e-06	7.39e-06	8.34e-06	5.02e-06	8.05e-06	7.1e-06	2.153e-05	8.06e-06	7.873e-05	1.33e-05	7.76e-06	5.26e-06	7.97e-06	4.59e-06	7.99e-06	7.64e-06
755	250	PND200	6.83e-06	5.04e-06	6.37e-06	7.22e-06	7.04e-06	4.36e-06	7.2e-06	4.91e-06	5.79e-06	5.28e-06	6.37e-06	4.09e-06	5.46e-06	4.71e-06	6.39e-06	7.85e-06	4.8e-06	5.61e-06	6.74e-06	6.93e-06	5.15e-06	5.09e-06	5.76e-06	2.94e-06	4.63e-06	6.75e-06	7.61e-06	4.99e-06	3.26e-06	4.78e-06	7.73e-06	4.66e-06	7.96e-06	5.89e-06	7.98e-06	5.73e-06	7.22e-06	1.614e-05	8.84e-06	7.551e-05	2.989e-05	6.22e-06	5.79e-06	3.94e-06	8.39e-06	3.6e-06	4.49e-06
607	250	PND200	6.91e-06	1.255e-05	9.43e-06	5.73e-06	8.53e-06	5.42e-06	8.49e-06	7.56e-06	1.31e-05	1.097e-05	7.6e-06	4.63e-06	7.16e-06	6.58e-06	8.57e-06	7.23e-06	7.24e-06	9.8e-06	6.61e-06	6.4e-06	5.8e-06	9.9e-06	7.02e-06	6.29e-06	1.012e-05	6e-06	5.84e-06	9.24e-06	7.22e-06	8.44e-06	8.04e-06	7.92e-06	7.28e-06	5.9e-06	7.54e-06	9.69e-06	9.55e-06	1.14e-05	7.21e-06	9.186e-05	1.401e-05	1.027e-05	1.099e-05	5.42e-06	6.07e-06	7.8e-06	6.7e-06
863	250	PND200	5.48e-06	7.77e-06	5.58e-06	5.81e-06	4.96e-06	4.69e-06	5.74e-06	8.86e-06	6.06e-06	5.09e-06	6.81e-06	6.73e-06	5.37e-06	8.29e-06	5.99e-06	2.7e-06	3.82e-06	7.56e-06	5.62e-06	4.8e-06	5.09e-06	5.97e-06	5.75e-06	4.6e-06	5.28e-06	5.6e-06	8.41e-06	5.75e-06	9.55e-06	5.58e-06	8.12e-06	9.78e-06	5.58e-06	6.04e-06	5.26e-06	3.73e-06	4.24e-06	2.171e-05	7.64e-06	8.261e-05	3.505e-05	5.16e-06	7.63e-06	7.25e-06	6.86e-06	4.64e-06	7e-06
822	250	PND200	5.36e-06	8.9e-06	7.75e-06	4.78e-06	4.6e-06	4.89e-06	4.9e-06	6.59e-06	6.22e-06	7.54e-06	1.004e-05	5.69e-06	4.47e-06	6.44e-06	3.17e-06	4.16e-06	5.29e-06	5.44e-06	4.23e-06	7.11e-06	6.63e-06	3.78e-06	5.83e-06	7.29e-06	5.12e-06	6.27e-06	6.89e-06	6.42e-06	8.09e-06	7.07e-06	6.36e-06	4.72e-06	4.12e-06	3.71e-06	5.73e-06	3.54e-06	3.17e-06	2.041e-05	7.84e-06	0.00010277	2.792e-05	4.6e-06	4.92e-06	5.49e-06	4.5e-06	4.64e-06	5.98e-06
1045	250	PND200	5.19e-06	5.4e-06	4.39e-06	5.1e-06	6.05e-06	7.31e-06	5.28e-06	5.7e-06	9.31e-06	4.55e-06	6.79e-06	5.65e-06	6.78e-06	5.48e-06	8.78e-06	8.45e-06	8.42e-06	8.75e-06	7.76e-06	5.28e-06	7.93e-06	8.31e-06	5.62e-06	4.59e-06	5.4e-06	6.31e-06	6.77e-06	7.59e-06	9e-06	3.78e-06	7.23e-06	7.34e-06	6.04e-06	6.66e-06	5.76e-06	8.04e-06	3.48e-06	1.537e-05	7.76e-06	7.22e-05	2.678e-05	8.36e-06	1.09e-05	9.15e-06	6.64e-06	7.66e-06	7.12e-06
[truncated: 824 more columns]
